1 T cell transcription factor expression evolves as adaptive immunity matures in granulomas from  
2 *Mycobacterium tuberculosis*-infected cynomolgus macaques

3

4

5 Nicole L. Grant<sup>1</sup>, Pauline Maiello<sup>2</sup>, Edwin Klein<sup>3</sup>, Philana Ling Lin<sup>4,5</sup>, H. Jacob Borish<sup>2</sup>, Jaime  
6 Tomko<sup>2</sup>, L. James Frye<sup>2</sup>, Alexander G. White<sup>2</sup>, Denise E. Kirschner<sup>6</sup>, Joshua T. Mattila<sup>1,5</sup>, JoAnne  
7 L. Flynn<sup>2,5</sup>

8

9 Affiliations:

- 10 1. Department of Infectious Diseases and Microbiology, Graduate School of Public Health,  
11 University of Pittsburgh, Pittsburgh, PA, United States of America
- 12 2. Department of Microbiology and Molecular Genetics, University of Pittsburgh School of  
13 Medicine, University of Pittsburgh, Pittsburgh, PA, United States of America
- 14 3. Division of Laboratory Animal Research, University of Pittsburgh, Pittsburgh PA
- 15 4. Department of Pediatrics, Children's Hospital of Pittsburgh of the University of Pittsburgh  
16 Medical Center, Pittsburgh, Pennsylvania, United States of America.
- 17 5. Center for Vaccine Research, University of Pittsburgh, Pittsburgh, Pennsylvania, United  
18 States of America
- 19 6. Department of Microbiology and Immunology, University of Michigan Medical School,  
20 Ann Arbor, Michigan, United States of America.

21

22 Corresponding Author:

23 JoAnne L. Flynn

24 Address: University of Pittsburgh, 5058 Biomedical Science Tower 3, 3501 Fifth Avenue,  
25 Pittsburgh PA, 15261

26 Email: joanne@pitt.edu

27

28 Phone: 412-624-7743

29 FAX: 412-648-3394

30

31 Competing Interests:

32 Authors from the University of Pittsburgh and University of Michigan have no competing interests.

33

34 SUMMARY

35 *Mycobacterium tuberculosis* (*Mtb*), the causative agent of tuberculosis (TB), is a global health  
36 concern, yearly resulting in 10 million new cases of active TB. Immunologic investigation of lung  
37 granulomas is essential for understanding host control of bacterial replication. We identified and  
38 compared the pathological, cellular, and functional differences in granulomas at 4, 12, and 20  
39 weeks post-infection in Chinese cynomolgus macaques. Original granulomas differed in  
40 transcription factor expression within adaptive lymphocytes with those at 12 weeks showing  
41 higher frequencies of CD8<sup>+</sup>T-bet<sup>+</sup> T cells, while increases in CD4<sup>+</sup>T-bet<sup>+</sup> T cells were observed at  
42 20 weeks post-infection. The appearance of T-bet<sup>+</sup> adaptive T cells at 12 and 20 weeks was  
43 coincident with a reduction in bacterial burden, suggesting their critical role in *Mtb* control. This  
44 study highlights the evolution of T cell responses within lung granulomas, suggesting that  
45 vaccines promoting the development and migration of T-bet<sup>+</sup> T cells would enhance mycobacterial  
46 control.

47

48 INTRODUCTION

49 *Mycobacterium tuberculosis* (*Mtb*), the etiologic agent of tuberculosis (TB), has caused  
50 considerable morbidity and mortality for thousands of years (Barberis et al., 2017). Due to the  
51 COVID-19 pandemic, TB mortality is estimated to increase despite headway made in recent years  
52 by the End TB strategy (2020). There are still many unanswered questions about interactions of

53 *Mtb* with its human host, and understanding these interactions are critical to development of  
54 improved treatments and preventive strategies. The complexity of TB disease is highlighted in the  
55 intricate pathological structure that forms following inhalation of *Mtb* bacilli, the lung granuloma.  
56 This dynamic structure is comprised of both innate and adaptive immune cells which undergoes  
57 cellular and molecular fluctuations throughout the course of infection leading to disparate  
58 trajectories, with some restricting or killing bacilli and others exhibiting a failure in bacterial control,  
59 propagating dissemination and progressive disease.

60

61 Despite extensive research, the immunological contributors to bacterial control in granulomas are  
62 not well understood. Studies investigating the role of adaptive T cells in *Mtb* infected mice have  
63 revealed IFN- $\gamma$  dependent and independent mechanisms of control, suggesting that these cells  
64 have other critical functions in limiting TB disease (Kumar, 2017, Green et al., 2013, Gallegos et  
65 al., 2011). The influence of transcription factor (TF) expression, as a surrogate for immune cell  
66 function, has been studied in mice infected with *Mtb*, revealing a protective phenotype related to  
67 expression of the pro-inflammatory TF, T-bet (Sullivan et al., 2005). This is supported by studies  
68 in human patients with MSMD (Mendelian susceptibility to mycobacterial disease), which can be  
69 caused by defects in the genes encoding T-bet (*TBX21*) and ROR $\gamma$ T (*RORC*) (Okada et al., 2015,  
70 Yang et al., 2020). A better understanding of TF expression within the context of the granuloma  
71 would enhance our ability to interpret T cell function in TB.

72

73 Investigating granuloma function in human TB disease is limited due to difficulty in obtaining  
74 representative samples, lack of data regarding time of infection, variable treatments, and little  
75 microbiologic information, necessitating the use of an animal model. Whereas many models for  
76 TB exist, non-human primates (NHPs) are invaluable as they reflect the range in granuloma  
77 pathology seen in humans (Capuano et al., 2003b, Lin et al., 2009). *Cynomolgus* macaques

78 infected with virulent *Mtb* strains have been particularly useful as they recapitulate the full  
79 spectrum of infection outcomes seen in humans ranging from controlled (latent infection) to active  
80 TB disease (Lin et al., 2009, Lin et al., 2014, Maiello et al., 2017). We track granuloma formation  
81 following *Mtb* infection through positron emission tomography and computed tomography (PET  
82 CT) using  $^{18}\text{F}$ -fluorodeoxyglucose (FDG) as a PET probe, which incorporates into metabolically  
83 active host cells within granulomas (White et al., 2017, Coleman et al., 2014b, Coleman et al.,  
84 2014a, Lin et al., 2013). Serial PET CT scans over the course of infection provide a history for  
85 individual granulomas including time of detection, location, and changes in size and FDG avidity  
86 (Coleman et al., 2014b, White et al., 2017). Understanding the timing of granuloma formation is  
87 critical as granulomas observed at 4 weeks post-infection (termed original granulomas) represent  
88 those that are established by individual *Mtb* bacilli from the inoculum (Martin et al., 2017). Previous  
89 data indicate that granulomas which develop at later timepoints post infection (new granulomas),  
90 either through dissemination or slower growth of *Mtb*, have different features as they arise during  
91 an ongoing immune response, resulting in a decreased bacterial burden (Gideon et al., 2021, Lin  
92 et al., 2014). Differences in bacterial burden are also observed throughout the course of infection  
93 in granulomas; although the immune mechanisms responsible for this reduction in bacterial  
94 burden remain unclear, it likely relates to the evolving immunological state of the granuloma (Lin  
95 et al., 2014).

96  
97 The present study is the first to investigate the interplay of TFs and bacterial dynamics in original  
98 NHP lung granulomas throughout the course of infection. We aimed to evaluate the cellular and  
99 functional changes in original granulomas over time using samples from macaques necropsied at  
100 early (4 weeks), mid (12 weeks), and late (20 weeks) timepoints post-infection. We observed  
101 temporal differences in TF expression in adaptive lymphocytes that correlate with bacterial  
102 burden, providing novel insights into the evolution of TB lung granulomas over time. These data

103 suggest that protective adaptive immune responses are slow to develop and are coincident with  
104 a reduced bacterial burden in granulomas at later timepoints post-infection.

105

## 106 RESULTS

### 107 **Study design and granuloma dynamics in original granulomas**

108 To assess temporal changes in cellular composition, structure, and function of granulomas, 8  
109 cynomolgus macaques were infected with a low dose of virulent *Mtb* and necropsied at 4 weeks  
110 (N=2), 12 weeks (N=3), or 20 weeks (N=3), representing early, mid, and late timepoints post-  
111 infection (Figure 1A). Granuloma formation was tracked over time using serial PET CT imaging  
112 starting at 4 weeks post-infection with PET CT scans performed every two to four weeks for the  
113 duration of the study. Based on these scans, we identified 94 original granulomas as those first  
114 observed on a 4-week scan which were individually harvested at necropsy and homogenized to  
115 a single cell suspension which was used for colony forming unit (CFU) quantification and flow  
116 cytometry. For granulomas >2mm, a portion was fixed in formalin for histology. In this study, our  
117 focus was on granuloma cellular composition, structure, and functional changes over time using  
118 only original granulomas. Consistent with previous data, original granulomas at 4 weeks post-  
119 infection had significantly higher CFU but similar size as measure by PET CT, when compared to  
120 original granulomas harvested at mid and late timepoints (Figure 1B) (White et al., 2017, Lin et  
121 al., 2014).

122

### 123 **Histopathology and cellular spatial arrangement of original granulomas**

124 Lung granulomas from *Mtb*-infected macaques are structurally similar to granulomas found in  
125 human TB patients (Flynn et al., 2015). Spatial arrangement is likely to be important for immune  
126 interactions and bacterial containment; thus, we compared the histological and spatial differences  
127 in original granulomas at early, mid, and late timepoints post-infection (Millar et al., 2021). In  
128 addition to samples from the monkeys dedicated to this study, we supplemented with banked

129 samples of original granulomas isolated from monkeys at similar timepoints post-infection. The  
130 majority of original granulomas in individual animals had necrotic features, though lower  
131 frequencies of necrotic original granulomas were observed at the late timepoint compared to the  
132 early timepoint (Figure 1C). Necrotic or caseous features in granulomas can be observed in  
133 conjunction with other histologic findings such as fibrosis, collagenization, or mineralization  
134 (Flynn, 2011, Capuano et al., 2003b). While these secondary components were occasionally seen  
135 in original granulomas at the early timepoint, they were observed more frequently in original  
136 granulomas at the mid and late timepoints, suggesting they are temporally related to the  
137 transitional granuloma environment (Figure 1C). A range of histopathological classifications (as  
138 defined by our pathologist, EK) were also seen in original granulomas at all timepoints including  
139 classically necrotic, as well as rarer pathologies, such as evolving necrosis, early collagenization,  
140 fibrocalcific, and granuloma scarring (Supplemental Fig. 1C). We compared the CFU of fibrotic  
141 versus non-fibrotic granulomas from the mid and late timepoints and observed improved bacterial  
142 control in granulomas with fibrosis compared to non-fibrotic granulomas (Supplemental Fig. 1A),  
143 consistent with previous data (Lin et al., 2014).

144

145 While original granulomas at 12 and 20 weeks have reduced CFU compared to those at 4 weeks,  
146 sterilization of original granulomas from animals in this study and banked samples was rare at all  
147 timepoints, with the highest proportion at late timepoints (Supplemental Fig. 1B). Furthermore,  
148 sterile granulomas from the mid and late timepoints had split classifications based on histologic  
149 components, with some being fibrotic, neutrophilic, collagenic, or classically necrotic  
150 (Supplemental Fig. 1B). Classic necrotic granulomas are structurally organized, having a central  
151 caseous core surrounded by concentric rings of epithelioid macrophages and lymphocytes (Flynn  
152 et al., 2011, Flynn, 2011). With the exception of secondary structural elements (i.e. mineralization,  
153 fibrosis), visual comparison of H&E stained original necrotic granulomas from different timepoints  
154 revealed no distinct differences in overall granuloma structure (Figure 1D). We assessed this

155 typical granuloma structure using immunofluorescent stained tissue sections for CD3<sup>+</sup>, CD11c<sup>+</sup>,  
156 and CD163<sup>+</sup>, finding more clusters of CD11c<sup>+</sup> cells in granulomas from the early and mid  
157 timepoints. These clusters may be a precursor to the typically observed macrophage ring,  
158 suggesting that timing plays a role in the development of cellular spatial compartments in  
159 granulomas (Figure 1D).

160

### 161 **Cellular composition in original lung granulomas over time**

162 Granulomas are dynamic structures composed of lymphoid and myeloid cells that contribute to  
163 bacterial control. We and others have previously reported substantial heterogeneity in granulomas  
164 in individual macaques and across macaques (Capuano et al., 2003a, Lin et al., 2014, Gideon et  
165 al., 2015, Maiello et al., 2017). Here we investigated whether there were differences in overall  
166 cellular composition in 94% of the original granulomas (88 of the 94) identified by PET CT using  
167 flow cytometry (Supplemental Fig. 2). A higher overall adjusted cell count (see Materials and  
168 Methods) was observed at the early timepoint for both myeloid and lymphocyte populations,  
169 whereas frequencies of these cell types were similar across all timepoints (Figure 2A and  
170 Supplemental Fig. 3A). There were no significant differences in the frequency of CD3<sup>+</sup> cells across  
171 timepoints but significantly higher frequencies of CD20<sup>+</sup> B cells at the mid timepoint and  
172 significantly higher frequencies of CD3<sup>-</sup>CD20<sup>-</sup> cells (including NK and other innate lymphocytes)  
173 at the late timepoint (Figure 2C). Further analysis into CD3<sup>+</sup> subsets revealed significantly lower  
174 frequencies of CD4<sup>+</sup> T cells at the mid compared to the late timepoint (medians: mid-19.69%, late-  
175 24.39%, p value-0.0297) and significant differences in the frequencies of CD8<sup>+</sup> T cells at each  
176 timepoint with the highest levels being at the mid timepoint (medians: early-17.36%, mid-27.46%,  
177 late-20.26%, p values-<0.0001 for early to mid, 0.0161 for mid to late, and 0.0112 for early to late)  
178 (Figure 2B-D). We observed low frequencies of both CD3<sup>+</sup>CD4<sup>-</sup>CD8<sup>-</sup> and CD3<sup>+</sup>CD4<sup>+</sup>CD8<sup>+</sup> cells at  
179 all timepoints with the highest median frequency for both cell types at the early timepoint (median:  
180 4.81% and 4.95%, respectively) (Figure 2B and D).

181  
182 Myeloid cells make up approximately 25% of the cells in original granulomas regardless of  
183 timepoint (Supplemental Fig. 3A); since there were more cells in early granulomas these samples  
184 also had the highest adjusted myeloid cell count. At the early timepoint, there were higher  
185 frequencies of CD11c<sup>+</sup>, CD11b<sup>+</sup>, and CD163<sup>+</sup> myeloid cells in granulomas (Supplemental Fig. 3B-  
186 C). To evaluate functional differences in myeloid cells we compared the frequency of these cells  
187 producing IL-10, TNF, and IFN- $\gamma$ . While the frequencies of myeloid cells expressing any of the  
188 cytokines investigated was very low, there were significantly higher levels of IL-10 and IFN- $\gamma$  in  
189 the late timepoint compared to the mid and early timepoints and significantly lower levels of TNF  
190 at the mid timepoint compared to early (Supplemental Fig. 3D).

191  
192 **Transcription factor expression increases in granuloma adaptive T cells at 12 and 20**  
193 **weeks post-infection**

194 T cells are known to be important for controlling *Mtb*, however the breadth in function of these  
195 cells within lung granulomas remains incompletely studied. Our data (Figure 2C) and previous  
196 data suggest that although CD3<sup>+</sup> cells make up approximately half of all cells in the granuloma  
197 (medians 50.63 - 53.78%) across timepoints, very few are reportedly producing cytokines within  
198 the granuloma (Gideon et al., 2015, Wong et al., 2018, Phuah et al., 2016, Millar et al., 2021). In  
199 this study, we analyzed lymphocytes directly from granulomas without additional stimulation to  
200 capture the functions that were occurring *in situ*, as granulomas contain *Mtb* antigens and live  
201 and dead bacilli which can serve as forms of T cell stimulation (Gideon et al., 2019). We observed  
202 very low frequencies of pro-inflammatory cytokine expression by all lymphocytes at any timepoint,  
203 though there is a significantly higher frequency of cells expressing IFN- $\gamma$  and TNF in original  
204 granulomas from the early timepoint when compared to the mid and late timepoints (Supplemental  
205 Fig. 4A). Using markers that indicate activation, we observed the highest frequency of CD69<sup>+</sup>



206 lymphocytes at the early timepoint and the inverse for expression of PD-1 (Supplemental Fig. 4A)  
207 (Freeman et al., 2000, Ziegler et al., 1994, Cibrián and Sánchez-Madrid, 2017). This temporal  
208 expression of activation markers was similar in CD3<sup>+</sup> subsets with PD-1 expression being highest  
209 at the late timepoint and CD69 at the early or mid timepoints (Supplemental Fig. 4B). The CD4<sup>+</sup>  
210 and CD8<sup>+</sup> adaptive T cells showed very low frequencies of IFN- $\gamma$  and TNF, with slightly higher  
211 frequencies occurring at the early and mid timepoints for CD4<sup>+</sup> T cells (medians: early-1.49%,  
212 mid-1.52%, late-0.25%) (Supplemental Fig. 4B). Notable was the high frequency of IFN- $\gamma$  and  
213 TNF production from CD3<sup>-</sup>CD20<sup>-</sup> cells at the early timepoint (medians: IFN- $\gamma$ -16.85%, TNF-  
214 8.72%), emphasizing their early innate function (Supplemental Fig. 4C).

215  
216 To provide additional insight into the function of granuloma cells we used flow cytometry to identify  
217 populations of transcription factor (TF) positive lymphocytes. The TF assessed were GATA3, T-  
218 bet, Foxp3, ROR $\alpha$  and ROR $\gamma$ T, which are regulators of cell differentiation and lineage  
219 commitment during an immune response for lymphoid cells (Nejati Moharrami et al., 2018, Saini  
220 et al., 2018, Yates et al., 2004, Wang et al., 2012, Fang and Zhu, 2017). Boolean gating indicated  
221 that the majority of lymphocytes in original granulomas at all timepoints did not express any of the  
222 TFs investigated (Figure 3A). Nevertheless, there was a significant increase in single and double  
223 TF expression at the mid and late timepoints post-infection (Figure 3A). When assessing only  
224 single TF expression in lymphocytes in granulomas across timepoints, there were statistically  
225 significant differences in all TFs investigated (Figure 3B-C). Although levels of Foxp3 and ROR $\gamma$ T  
226 were very low at all timepoints, levels of ROR $\alpha$ , GATA3 and T-bet were more substantial (Figure  
227 3B-C).

228  
229 Further analysis revealed that TF expression was dependent on lymphocyte subset. Conventional  
230 CD4<sup>+</sup> T cells had a significant increase in the proportion of single TF<sup>+</sup> cells in granulomas from

231 the late timepoint (Supplemental Fig. 5A). Similarly, approximately 20% of CD4<sup>+</sup>CD8<sup>+</sup> cells, which  
232 represent a subset of CD4 cells with a heightened activation profile, expressed a single TF at the  
233 early and mid timepoints, but had significantly higher expression at the late timepoint  
234 (Supplemental Fig. 5B) (Diedrich et al., 2019, Clénet et al., 2017). This contrasts with CD8<sup>+</sup> T  
235 cells which had a median of 12.95% single TF expression at the early timepoint, with significantly  
236 higher frequencies of single TF<sup>+</sup> cells at both the mid (median: 24.2%) and late (median: 25.3%)  
237 timepoints, revealing that increases in TF expression in CD8<sup>+</sup> T cells occur earlier in granulomas  
238 compared to CD4<sup>+</sup> cells (Supplemental Fig. 5A-C). CD3<sup>+</sup>CD4<sup>-</sup>CD8<sup>-</sup> cells, which include NK T cells  
239 and some  $\gamma\delta$  T cells, had very low frequencies of single TF expression at the early timepoint and  
240 significantly higher frequencies at the mid and late timepoints with a highest median expression  
241 of 29.9% at the mid timepoint, although this expression was animal dependent (Supplemental  
242 Fig. 5D). There was a trend for higher single TF expression in B cells (CD3<sup>-</sup>CD20<sup>+</sup>) at the mid and  
243 late timepoints as compared to the early timepoint, although driven by one animal at the late  
244 timepoint (Supplemental Fig. 5E). Innate lymphocytes (CD3<sup>-</sup>CD20<sup>-</sup> cells), however, had similar  
245 frequencies of cells with single positive TF expression at all timepoints (medians: 24.64%,  
246 33.07%, and 25.35%) (Supplemental Fig. 5F). Conventional T cells (CD4<sup>+</sup>, CD4<sup>+</sup>CD8<sup>+</sup>, and CD8<sup>+</sup>)  
247 and B cells had significantly higher expression of two TFs at the late timepoint compared to the  
248 early and mid (Supplemental Fig. 5A-C, E).

249  
250 To investigate specific TF expression within lymphocyte subsets, we compared single TF  
251 expression, keeping in mind the frequency of lymphocyte subsets in granulomas at each timepoint  
252 (number of granulomas assessed: early=24, mid=31, late=33) (Figure 4A). Consistent with what  
253 was observed in all lymphocytes (Figure 3B), there were relatively low frequencies of individual  
254 TF expression in many of the lymphocyte subsets at the early timepoint, with highest frequencies  
255 of ROR $\alpha$  CD4<sup>+</sup> T cells (Figure 3B-C, 4B). Innate lymphocytes (CD3<sup>-</sup>CD20<sup>-</sup>), had moderate levels

256 of T-bet expression (medians: 16.7%, 27.92%, and 21.61%) at all timepoints investigated (Figure  
257 4B), suggesting these cells play a role throughout infection. There was minimal TF expression in  
258 CD20<sup>+</sup> B cells at all timepoints investigated, with modest increases in the frequency of ROR $\alpha$  and  
259 GATA3 at the late timepoint, though these changes appear to be animal dependent (Figure 4B).  
260 At the early timepoint, we observed a low frequency of T-bet within adaptive CD3<sup>+</sup> T cells  
261 (medians: CD4<sup>+</sup>:2.44%, CD8<sup>+</sup>:4.65%, and CD4<sup>+</sup>CD8<sup>+</sup>:7.5%) (Figure 4B). However, at 12 and 20  
262 weeks post-infection there was a 5-fold increase in T-bet expression in CD8<sup>+</sup> T cells (medians  
263 22.2% and 21.2%). In contrast, there was no significant increase in T-bet<sup>+</sup>CD4<sup>+</sup> T cells (including  
264 CD4<sup>+</sup> T cells expressing CD8, i.e. CD4<sup>+</sup>CD8<sup>+</sup>) until 20 weeks post-infection (median CD4<sup>+</sup>:17.59%  
265 CD4<sup>+</sup>CD8<sup>+</sup>:21.0%) (Figure 4B) (Diedrich et al., 2019, Clénet et al., 2017). Although GATA3<sup>+</sup>CD4<sup>+</sup>  
266 cells were rare in most granulomas, the proportions observed at the mid and late timepoints were  
267 modestly increased in some animals. While frequencies of cells expressing two TFs were low at  
268 all timepoints (<6% of lymphocytes, Figure 3A), we observed significant increases in the co-  
269 expression of T-bet<sup>+</sup>ROR $\alpha$ <sup>+</sup> and T-bet<sup>+</sup>GATA3<sup>+</sup> at the late timepoint compared to the early and  
270 mid timepoints (Supplemental Fig. 5G). Taken together, these data support an evolution of the  
271 adaptive T cell response in granulomas over time.

272

273 To validate the flow cytometry data for TF expression and to investigate the localization of these  
274 cells in granulomas, we used immunofluorescence staining of granuloma tissue sections from the  
275 early, mid, or late timepoints post-infection. In keeping with the low levels of TF expression in  
276 early granulomas (Figure 4B), we found few CD3<sup>+</sup> cells expressing ROR $\alpha$  or GATA3 in granuloma  
277 tissue sections (Supplemental Fig. 6A, B). Although the frequency of Foxp3<sup>+</sup> cells was  
278 consistently low at all timepoints, we could detect Foxp3 expressing CD3<sup>+</sup>CD4<sup>+</sup> T cells  
279 (designated by arrows) (Supplemental Fig. 6C). Using a mid timepoint granuloma, we identified  
280 CD3<sup>+</sup>T-bet<sup>+</sup> cells throughout the lymphocyte region as well as within clusters of CD11c<sup>+</sup>

281 macrophages (macrophage region), suggesting a potential interaction between these cell types  
282 (Figure 5A). There was consistent nuclear localization of T-bet (designated by arrows), indicating  
283 an activated cellular phenotype (Figure 5A) (McLane et al., 2013).

284

285 **Transcription factor positive cells have higher frequencies of pro-inflammatory cytokines**  
286 **than transcription factor negative cells**

287 To assess the functionality of the TF<sup>+</sup> cells we compared the frequency of pro-inflammatory  
288 cytokine expression in TF<sup>+</sup> cells versus TF<sup>-</sup> cells from the same sample (Figure 6A-C). At all  
289 timepoints, ROR $\alpha$ <sup>+</sup> or T-bet<sup>+</sup> CD4<sup>+</sup> and CD4<sup>+</sup>CD8<sup>+</sup> T cells had higher frequencies of IFN- $\gamma$ , TNF  
290 and CD69 expression compared to TF<sup>-</sup> cells, supporting that TF<sup>+</sup> cells are activated and functional  
291 (Figure 6A, B). T-bet<sup>+</sup>CD4<sup>+</sup> and T-bet<sup>+</sup>CD4<sup>+</sup>CD8<sup>+</sup> T cells had a higher frequency of PD-1 at the  
292 mid and late timepoints, suggesting that these cells have a different activation profile than  
293 ROR $\alpha$ <sup>+</sup>CD4<sup>+</sup> cells at the early timepoint. T-bet<sup>+</sup> innate lymphoid cells (CD3<sup>-</sup>CD20<sup>-</sup>) at the early  
294 timepoint had significantly higher production of both IFN- $\gamma$  and TNF compared to T-bet<sup>-</sup> cells,  
295 indicating that T-bet<sup>+</sup> innate lymphocytes are one contributor of pro-inflammatory cytokines in  
296 early granulomas (Supplemental Fig. 7).

297

298 CD8<sup>+</sup> T cells showed very low frequencies of cytokine<sup>+</sup> cells at all timepoints. Despite this,  
299 TF<sup>+</sup>CD8<sup>+</sup> cells exhibited higher frequencies of pro-inflammatory cytokines when compared to TF<sup>-</sup>  
300 CD8<sup>+</sup> cells (Figure 6C). TF expression in conjunction with low frequencies of cytokine expression  
301 suggested that CD8<sup>+</sup> T cells are contributing to the granuloma environment through other  
302 functions, such as producing cytotoxic molecules. To investigate this, we stained a granuloma  
303 from 12 weeks post-infection, observing granzyme B localization within CD3<sup>+</sup>CD8<sup>+</sup> cells  
304 (designated by arrows) (Figure 5B). We observed colocalization of granzyme B with CD3<sup>+</sup>T-bet<sup>+</sup>  
305 cells in the same granuloma and in a late timepoint granuloma (arrows) (Figure 5B, Supplemental

306 Fig. 6D). The available CD8 and T-bet antibodies could not be used in tandem for staining, limiting  
307 the ability to directly identify granzyme B expression in CD8<sup>+</sup>T-bet<sup>+</sup> cells but, taken together, our  
308 data suggests that CD3<sup>+</sup>CD8<sup>+</sup> cells expressing T-bet produce granzyme B at 12 weeks post-  
309 infection. Of note, we observed granzyme B staining within the caseum; although this was not  
310 associated with intact nuclei (Dapi), this may be true signal, potentially suggesting the caseum is  
311 a sink for granzyme B. The presence of granzyme B within the caseum was also observed in  
312 granulomas from the late timepoint but varied in abundance between granulomas (Figure 5B,  
313 Supplemental Fig. 6D).

314

### 315 **Frequency of T-bet<sup>+</sup> cells negatively correlates with granuloma bacterial burden**

316 Granulomas can contribute to *Mtb* protection by promoting immune responses that kill or restrict  
317 bacterial replication; conversely, they may promote disease by supporting *Mtb* growth and  
318 dissemination. By analyzing snapshots of granulomas at different timepoints we can begin  
319 unravelling specific immune elements that are associated with a reduction in bacterial burden.  
320 One striking difference between granulomas at 4 weeks versus those at 12 and 20 weeks is the  
321 presence of T-bet<sup>+</sup> T cells. Correlation analyses revealed a modest but significant negative  
322 correlation between the proportion of all T-bet<sup>+</sup> lymphocytes, CD4<sup>+</sup>T-bet<sup>+</sup>, or CD8<sup>+</sup>T-bet<sup>+</sup> cells and  
323 CFU per granuloma (Figure 7A-C). This association suggests that T-bet<sup>+</sup> lymphocytes are one  
324 contributor to the reduction in bacterial burden seen in granulomas at 12 and 20 weeks post-  
325 infection.

326

## 327 DISCUSSION

328 Understanding the process of bacterial restriction and containment in lung TB granulomas is  
329 critical for identifying new targets for vaccines and therapeutics. Here we compared original  
330 granulomas, i.e. those that arise from initial infection as determined by PET CT, from three distinct  
331 timepoints (4, 12, and 20 weeks) post-infection in NHPs (Martin et al., 2017). These timepoints

332 represent early infection (early), the beginning of infection control (mid), and late infection (late),  
333 respectively. This affords an opportunity for temporal analysis of granuloma structure, cellular  
334 composition, and function, providing insight into some of the immune components that contribute  
335 to a reduction in bacterial burden. Our results reveal that immune responses mediated by T-bet  
336 expressing T cells are delayed in granulomas, supporting that adaptive immunity in granulomas  
337 evolves over time. The slow evolution of adaptive immunity likely contributes to the ease of  
338 establishment of *Mtb* infection and substantial growth of the pathogen in early granulomas, where  
339 one originating bacillus in a granuloma reaches  $\sim 10^5$  CFU by 4 weeks (Lin et al., 2014). This  
340 suggests that vaccine-mediated enhancement of CD8<sup>+</sup> T cell responses, in addition to CD4<sup>+</sup> T cell  
341 responses, and rapid recruitment to the airways and lung following infection could improve  
342 protection against infection and progressive disease. Recent reports of vaccine strategies using  
343 CMV producing *Mtb* antigens, or intravenous and mucosal BCG support this concept as they  
344 induce strong CD4<sup>+</sup> and/or CD8<sup>+</sup> T cell responses in airways and lungs and induce robust  
345 protection against *Mtb* infection or disease in macaques (Darrah et al., 2020, Hansen et al., 2018,  
346 Dijkman et al., 2019).

347  
348 Granuloma structure has been investigated in various animal models and in humans, revealing a  
349 wide range of histopathological features. In humans and NHPs infected with *Mtb*, granulomas are  
350 classified as having necrotic (caseous), fibrotic, non-necrotic, mineralized, scarring, cavitory, and  
351 suppurative phenotypes (Flynn et al., 2015, Flynn, 2011, Lin et al., 2014). Necrotic granulomas  
352 were the most observed phenotype among original granulomas in this study, regardless of  
353 timepoint post-infection, however, a range of granuloma structures were observed in original  
354 lesions at the mid and late timepoints including the presence of fibrosis. Prior studies in NHPs  
355 have investigated the role fibrosis plays in granuloma healing and containment which is consistent  
356 with the lower CFU in original granulomas with fibrosis observed in this study (Warsinske et al.,  
357 2017).

358

359 There were no major differences in the proportion of lymphocytes or myeloid cells in granulomas  
360 at the different stages of infection. There was a higher frequency in myeloid cell expression of the  
361 integrins CD11c and CD11b that aid in adherence, migration, and phagocytosis at the early  
362 timepoint (Lukácsi et al., 2020). A similar trend was observed in the frequency of cells expressing  
363 the scavenger receptor CD163, a marker often observed on alveolar macrophages (Bharat et al.,  
364 2016). While there are several potential hypotheses for these differences, one possibility is that  
365 granulomas from distinct timepoints are comprised of different myeloid subsets: i.e. early  
366 granulomas have more neutrophils and alveolar macrophages and fewer epithelioid  
367 macrophages. This hypothesis is reasonable as studies investigating the early events in  
368 granuloma formation and pathogen clearance reveal involvement of alveolar macrophages and  
369 neutrophils in the phagocytosis of bacteria and in bacterial clearance, respectively (Cohen et al.,  
370 2018). Regarding myeloid cell functionality, in late granulomas, we observed modest frequencies  
371 of cells producing IFN- $\gamma$  or IL-10. As levels of IL-10 are higher than IFN- $\gamma$ , myeloid cells may be  
372 more anti-inflammatory at late timepoints, possibly modulating pathology or contributing to *Mtb*  
373 persistence (Redford et al., 2011).

374

375 It is generally accepted that T cells are critical for the control of *Mtb* through production of cytokines  
376 such as IFN- $\gamma$ , although it is not the only mediator of protection and additional T cell functions are  
377 likely to be of equal importance (de Martino et al., 2019, Gideon et al., 2015, Lin et al., 2012,  
378 Gallegos et al., 2011). In fact, vaccines that induce production of IFN- $\gamma$  by CD4<sup>+</sup> T cells are not  
379 always successful in the prevention of TB in animal models or humans (Darrah et al., 2019, Darrah  
380 et al., 2020, Verreck et al., 2009, Tameris et al., 2013, Abou-Zeid et al., 1997, Orr et al., 2015,  
381 Griffiths et al., 2016). Our objective was to investigate lymphocytic phenotypes in granulomas at  
382 different timepoints not only for cytokine production but also for broader functionality using TFs.

383 The role of TFs as lineage specifying amongst T cells has been well established, connecting the  
384 expression of T-bet, GATA3, Foxp3, ROR $\alpha$ , and ROR $\gamma$ T to T<sub>H</sub>1, T<sub>H</sub>2, T<sub>reg</sub>, and T<sub>H</sub>17 cells,  
385 respectively (Szabo et al., 2000, Ivanov et al., 2006, Zheng and Flavell, 1997, Hori et al., 2003).  
386 In granulomas, regardless of timepoint, the majority of lymphocytes were not expressing any of  
387 these TFs. One possible explanation for low levels of TF expression is that lymphocytes in  
388 granulomas rarely encounter antigen presenting cells infected with *Mtb*, due to the spatial  
389 localization of cells in the granuloma, which has been predicted in previous studies using  
390 mathematical modeling (Millar et al., 2021). Another hypothesis is that many of the lymphocytes  
391 in granulomas are not specific for *Mtb* but migrate to the granuloma due to inflammatory signals  
392 and chemokines from infected or activated cells (Gideon et al., 2015, Wong et al., 2018, Millar et  
393 al., 2021). The necessity and function of adaptive T cell recruitment to *Mtb* infected lungs has  
394 been investigated using various models, with studies in mice highlighting the roles of IL-23 and  
395 IL-17 as critical in the early recruitment of functional T cells to the lungs (Marino et al., 2011, Millar  
396 et al., 2021, Kauffman et al., 2018, Domingo-Gonzalez et al., 2017, Khader et al., 2007). While  
397 contributing events in the evolution of the adaptive immune response are not fully understood,  
398 bacterial reduction likely depends on spatially positioned, functional T cells for interaction with  
399 infected macrophages, as observed here with T-bet<sup>+</sup> cells in granulomas at 12 and 20 weeks  
400 post-infection.

401  
402 At the 4 week timepoint, we observed two pronounced phenotypes: 1) production of IFN- $\gamma$  and  
403 TNF by innate lymphocytes and 2) ROR $\alpha$  expression in lymphocytes. ROR $\alpha$  is a member of the  
404 retinoid orphan receptor family and canonically known for its role in the development of ILCs and  
405 Th17 cells (Yang et al., 2008, Ferreira et al., 2021, Lo et al., 2019). More recently, ROR $\alpha$  was  
406 shown to be expressed in activated CD4<sup>+</sup> T cells of T<sub>H</sub>1 and T<sub>H</sub>2 helper cell lineages with  
407 relationships to chemotaxis and cell migration (Haim-Vilmovsky et al., 2021). Studies in *Mtb*



408 infected humans and mice also report an accumulation of ILCs in infected lungs and a protective  
409 role of ILC3s expressing the ROR $\alpha$  homolog, ROR $\gamma$ T, at early timepoints post-infection (Ardain  
410 et al., 2019). This suggests that innate lymphocytes as well as lymphocytes expressing ROR  
411 family proteins are vital cells in the early phases following *Mtb* infection, possibly for recruiting  
412 additional cells into the lung or granuloma which facilitate bacterial killing at later timepoints.

413

414 At 12 weeks post-infection, there was a substantial increase in the frequency of T-bet expression  
415 in CD8<sup>+</sup> T cells followed by the increased frequency of CD4<sup>+</sup>T-bet<sup>+</sup> cells at 20 weeks post-  
416 infection. The presence and role of T-bet has been investigated in the context of several infectious  
417 diseases, including TB, revealing its critical function in controlling infection through production of  
418 pro-inflammatory mediators, T cell trafficking, and inhibition of other T cell fates (Pritchard et al.,  
419 2019, Szabo et al., 2000, Sullivan et al., 2005, Lazarevic et al., 2013, Lord et al., 2005). The  
420 earlier temporal increase in T-bet<sup>+</sup>CD8<sup>+</sup> T cells which is coincident with a reduction in bacterial  
421 burden suggests these cells play a crucial role in bacterial control. This is consistent with our  
422 recent single cell RNAseq data from NHP granulomas at 10 weeks post-infection (Gideon et al.,  
423 2021). Despite increases in T-bet<sup>+</sup>CD8<sup>+</sup> cells at the mid and late timepoints, low frequencies of  
424 these cells produce pro-inflammatory cytokines. We instead observed granzyme B expression in  
425 these cells, suggesting a more traditional cytotoxic function. At the late timepoint, there are higher  
426 frequencies of CD4<sup>+</sup>T-bet<sup>+</sup> and CD4<sup>+</sup>CD8<sup>+</sup>T-bet<sup>+</sup> cells producing IFN- $\gamma$  or TNF and expressing  
427 PD-1 and CD69 when compared to T-bet<sup>-</sup> cells in the same granuloma. Surface expression of  
428 PD-1 is associated with activated cells or functional deficiency when co-expressed with other  
429 exhaustion markers, particularly in the context of cancer and viral infection (Barber et al., 2006,  
430 Dong et al., 2019). Studies in mice have identified an *Mtb* specific subset of PD-1<sup>+</sup>CD4<sup>+</sup> T cells  
431 that are functional and highly proliferative, potentially acting as a self-replenishing source of CD4<sup>+</sup>  
432 T cells in TB (Reiley et al., 2010). We have consistently observed low levels of cytokine production

433 from T cells in NHP granulomas, which initially suggested an exhausted phenotype. However, we  
434 previously reported low levels of exhaustion markers on CD3<sup>+</sup> T cells and no difference in the  
435 cytokine production in cells with or without specific exhaustion markers (Wong et al., 2018). These  
436 studies, taken together, suggest that PD-1 expression in T-bet<sup>+</sup>CD4<sup>+</sup> cells is likely related to T cell  
437 activation or regulation rather than exhaustion. Furthermore, our staining for T-bet<sup>+</sup> cells in  
438 granulomas showed nuclear localization of T-bet, which is indicative of an activated rather than  
439 exhaustive phenotype (McLane et al., 2013, McLane et al., 2021).

440

441 Though this study offers insight into the evolving granuloma environment, our flow panels for this  
442 experiment did not include antibodies to detect cytotoxic effector molecules or additional  
443 transcription factors which limited our ability to comprehensively assess immune responses in  
444 granulomas. Future studies will include assessment of additional effector molecules with a focus  
445 on cytotoxic effectors such as granzymes and granulysin. In addition, applying single cell RNA  
446 sequencing on cells isolated from granulomas at distinct timepoints post infection will provide a  
447 more robust and unbiased approach, corroborating the data provided herein.

448

449 In this study, early granulomas were characterized as having higher CFUs accompanied by higher  
450 frequencies of innate lymphocytes producing inflammatory cytokines and lower frequencies of  
451 adaptive lymphocytes expressing T-bet, or any of the TFs investigated. The increase in T-bet<sup>+</sup>  
452 CD8<sup>+</sup> T cells preceded the appearance of T bet<sup>+</sup> CD4<sup>+</sup> T cells at the later timepoints. This suggests  
453 that 4 weeks post-infection is prior to the development of an adaptive immune response, whereas  
454 at 12 weeks (CD8<sup>+</sup>) and 20 weeks (CD4<sup>+</sup> and CD8<sup>+</sup>) functional adaptive lymphocytes appear in  
455 granulomas, highlighting the prolonged time frame needed for development of a robust adaptive  
456 T cell response to *Mtb* (Mehra et al., 2010). When comparing original granulomas, the proportion  
457 of T-bet<sup>+</sup> lymphocytes, T-bet<sup>+</sup>CD4<sup>+</sup> and T-bet<sup>+</sup>CD8<sup>+</sup> cells negatively correlated with bacterial  
458 burden, suggesting that conventional T cells (CD4<sup>+</sup> and CD8<sup>+</sup>) expressing T-bet contribute to the

459 reduction in bacterial burden in granulomas at mid and late timepoints. The reduction in bacterial  
460 burden also coincides with an increase in histologic pathologies relating to granuloma healing or  
461 resolution. Although the temporal presence of T-bet<sup>+</sup> adaptive lymphocytes is likely driven by host  
462 and pathogen factors, vaccines and host-directed therapies aimed at facilitating faster recruitment  
463 of these functional adaptive T cells to *Mtb* infected lungs would likely promote bacterial control  
464 and containment of disease.

465

#### 466 ACKNOWLEDGEMENTS

467 We thank Cassandra Ameel, Carolyn Bigbee, Ryan Kelly, Amy Fraser, Janelle Gleim, Abigail  
468 Gubernat, Kush Patel, Mark Rodgers, and Jennie Vorhauer for their laboratory and technical  
469 assistance; Beth Junecko for imaging assistance; Chelsea Causgrove, Dan Fillmore, Kara  
470 Kracinovsky, Skyler Pergalske, and Jenn Sakal for veterinary assistance; and other members of  
471 the Flynn, Scanga, and Lin laboratories for their collaborative efforts and insightful conversations.  
472 This study was supported by a T32 training grant NIH 5T32AI1065380-13 and NIH AI123093 (JLF  
473 and DEK).

474

#### 475 AUTHOR CONTRIBUTION

476 JLF and DK conceived of the study. NLG contributed to the acquisition, analysis, and  
477 interpretation of data for drafting of the manuscript. EK, PLL, LJF, and JT aided in implementing  
478 animal protocols, care, or specimen acquisition. EK provided histologic images and sample  
479 descriptions. HJB, AW, and PM contributed to PET CT analysis and PM provided statistical  
480 expertise. JTM provided immunofluorescence expertise. All authors revised and approved the  
481 final version of this manuscript.

482

483 **Figure 1: Study design, original granuloma dynamics and pathology over time.**

484 (A) Eight Chinese cynomolgus macaques were infected with low dose (10-19 CFU) *Mtb* Erdman  
485 and followed for 4 (early), 12 (mid), or 20 (late) weeks post-infection. Original granulomas were  
486 defined as those first observed on the 4 weeks post-infection PET-CT scan. (B) Individual  
487 granuloma bacterial burden [colony forming units (CFU)] and size (mm) from PET-CT. Individual  
488 points represent original lung granulomas (early n=24, mid n=31, late n=33). Table indicates each  
489 animal number and associated color in graphs. (C) Histologic characteristics of original lung  
490 granulomas in individual animals (frequency of each granuloma type) of banked samples at early,  
491 mid, and late timepoints categorized by H&E descriptions. Data points represent individual  
492 animals (N = 14 early, 7 mid, and 8 late animals). (D) Representative images of  
493 immunofluorescence staining for CD3 (green), CD11c (red), and CD163 (blue) with paired H&E  
494 staining of original granulomas from the early, mid, and late timepoints. For B and C statistics,  
495 Kruskal Wallis tests were performed with Dunn's multiple comparisons-adjusted p values reported  
496 on the graphs.

497

498 **Figure 2: Few differences were observed in lymphocyte populations in original granulomas**  
499 **across timepoints.** Original granulomas at each timepoint were evaluated for cellular  
500 composition by flow cytometry. (A) Frequency (top) and numbers (bottom) of lymphocytes. Each  
501 symbol is a granuloma. (B) Relative proportions of each cell type (% of lymphocytes) in individual  
502 granulomas. Each column is a granuloma and are separated by macaque (colored horizontal bar)  
503 and timepoint. (C) Frequency of CD3<sup>+</sup>, CD3<sup>-</sup>CD20<sup>-</sup>, and CD3<sup>-</sup>CD20<sup>+</sup> of all live cells. (D) Frequency  
504 of CD4<sup>+</sup>, CD4<sup>+</sup>CD8<sup>+</sup>, CD8<sup>+</sup> and CD4<sup>-</sup>CD8<sup>-</sup> of all live cells. For A, C, and D statistics, Kruskal Wallis  
505 tests were performed with Dunn's multiple comparisons-adjusted p values reported on graphs.

506

507 **Figure 3: Temporal changes in transcription factor<sup>+</sup> lymphocytes in original granulomas.**

508 (A) Original granulomas were assessed for transcription factor (TF) expression in lymphocytes  
509 via intracellular flow cytometry and Boolean gated to determine frequency of single TF expression

510 and double TF expression in lymphocytes. (B) Frequency of lymphocytes expressing single TF  
511 from each timepoint. Individual symbols represent granulomas which are colored according to  
512 animal (Figure 1B). (C) Of the lymphocytes expressing a single transcription factor, the relative  
513 proportion of each of the five TF within individual granulomas is shown. Bars represent each  
514 granuloma and animals are noted by the colored horizontal line and grouped by necropsy  
515 timepoint. For A and B statistics, Kruskal Wallis tests were performed with Dunn's multiple  
516 comparisons-adjusted p values reported on graphs.

517

518 **Figure 4: Delay in T-bet expression by conventional T cells in original granulomas.**

519 (A) Pie charts representing the average frequencies of denoted cell types (colored legend at right)  
520 from each timepoint (derived from Figure 2B). (B) Frequencies of each single transcription factor  
521 in lymphocyte subpopulations based on Boolean gated flow cytometry data. Kruskal Wallis tests  
522 were performed with Dunn's multiple comparisons-adjusted p values reported on graphs.

523

524 **Figure 5: Presence, localization, and function of T-bet<sup>+</sup> lymphocytes in original  
525 granulomas.**

526 (A) Original granuloma from an animal 12 weeks post-infection with Dapi staining (left panel),  
527 CD3 (green), T-bet (red), and CD11c (blue) staining (right panel). Insets as denoted in large image  
528 show localization of T-bet<sup>+</sup>CD3<sup>+</sup> cells within macrophage regions (teal) as well as the lymphocyte  
529 cuff (magenta). (B) Original granuloma isolated from an animal 12 weeks post-infection showing  
530 localization of granzyme B (red) in CD3<sup>+</sup> (green) CD8<sup>+</sup>(blue) cells (co-registered as teal and  
531 denoted with arrows) (top panel) and CD3<sup>+</sup>(green)T-bet<sup>+</sup>(blue) expressing granzyme B (red)  
532 (denoted by arrows) (lower panel).

533

534 **Figure 6: Transcription factor<sup>+</sup> cells produce more cytokines than transcription factor<sup>-</sup> cells  
535 in original granulomas at all timepoints.** Comparison of pro-inflammatory cytokine (IFN- $\gamma$ , TNF)

536 production or activation marker (CD69, PD-1) expression in TF<sup>+</sup> T cells (ROR $\alpha$  for early, T-bet for  
537 late) compared to TF<sup>-</sup> T cells for CD4<sup>+</sup> T cells (A), CD4<sup>+</sup>CD8<sup>+</sup> T cells (B), and CD8<sup>+</sup> T cells (C).  
538 All comparisons were performed using Wilcoxon signed-rank tests.

539

540 **Figure 7: Bacterial burden negatively correlates with frequencies of T-bet<sup>+</sup> lymphocytes.**

541 (A) Frequency of T-bet<sup>+</sup> lymphocytes vs. log<sub>10</sub> CFU per granuloma. (B) Frequency of T-bet<sup>+</sup>CD4<sup>+</sup>  
542 vs. log<sub>10</sub> CFU per granuloma. (C) Frequency of T-bet<sup>+</sup>CD8<sup>+</sup> T cells vs. log<sub>10</sub> CFU per granuloma.  
543 CFU per granuloma was log transformed after adding 1 (to avoid having undefined values). Non-  
544 parametric Spearman correlation analyses were performed with rho and p values noted on  
545 individual graphs.

546

547 **MATERIALS AND METHODS**

548

549 **Ethics statement**

550 All experiments, protocols, and care of animals were approved by the University of Pittsburgh  
551 School of Medicine Institutional Animal Care and Use Committee (IACUC). The Division of  
552 Laboratory Animal Resources and IACUC adheres to national guidelines established by the  
553 Animal Welfare Act (7 U.S. Code Sections 2131-2159) and the Guide for the Care and use of  
554 Laboratory Animals (Eighth Edition) as mandated by the U.S. Public Health Service Policy.  
555 Animals used in this study were housed in rooms with autonomously controlled temperature and  
556 provided enhanced enrichment procedures as previously described (Winchell et al., 2020).

557

558 **Animals and *Mtb* infection**

559 Eight adult cynomolgus macaques (*Macaca fascicularis*) were infected with a low dose (15-20)  
560 CFU of *Mtb* (Erdman strain) via bronchoscopic installation as previously described (Supplemental  
561 Table 1) (Capuano et al., 2003b). NHPs were monitored daily in the Biosafety Level 3 (BSL3)

562 laboratory at the University of Pittsburgh in compliance with the University's Institutional Animal  
563 Care and Use Committee (IACUC). Prior to infection, animals were examined and placed in  
564 quarantine to evaluate health and confirm no prior *Mtb* infection. For pathology analysis and  
565 figures, banked control samples with corresponding PET CT scan data were used to supplement  
566 the animals dedicated to this study, with only original granulomas (i.e. those first observed on 4  
567 week scans) being utilized (Supplemental Table 2).

568

### 569 **FDG PET CT imaging**

570 Following *Mtb* infection, longitudinal PET CT imaging was performed to identify original  
571 granulomas and track disease over time. NHPs were sedated and injected with a PET tracer, 2-  
572 deoxy-2-(<sup>18</sup>F)Fluoro-D-glucose (FDG), and imaged using the Mediso MultiScan LFER 150  
573 (Mediso, Budapest, Hungary) PET CT integrated preclinical scanner (White et al., 2017, Lin et  
574 al., 2013). Imaging was performed in accordance with biosafety and radiation safety requirements  
575 within the BSL3 facility at the University of Pittsburgh every 2-4 weeks beginning at 4 weeks post-  
576 infection until pre-determined animal endpoint. Scans were analyzed using OsiriX DICOM  
577 (Pixmeo, Geneva, Switzerland) viewer software by in-house trained PET CT analysts (Pauline  
578 Maiello, H. Jacob Borish, and Alexander G. White) (White et al., 2017, Rosset et al., 2004).

579

### 580 **Necropsy**

581 Necropsy procedures were performed as previously described (Lin et al., 2009). In short,  
582 individual granulomas were identified using the pre-necropsy <sup>18</sup>F-FDG PET CT scan and isolated  
583 along with lymph nodes and portions of uninvolved lung lobes. At necropsy, NHPs were sedated  
584 with ketamine, maximally bled and humanely euthanized using pentobarbital and phenytoin  
585 (Beuthanasia; Schering-Plough, Kenilworth, NJ). To assess gross pathology, animals were  
586 scored based on number, size, and pattern of lung granulomas and extent of disease involvement  
587 in lobes, mediastinal LNs, and visceral organs as previously described (Lin et al., 2009). Tissues

588 were bisected and placed in formalin for paraffin embedding to perform histological evaluation.  
589 Single-cell suspensions were obtained for assessment of bacterial burden and immunological  
590 assays using gentle macs enzymatic dissociation (59% of samples) or physical homogenization.  
591 Bacterial burden was evaluated for individual tissue sections by plating serial dilutions of  
592 homogenate on 7H11 or PANTA agar plates and incubated at 37°C in 5%CO<sub>2</sub> for 21 days. Total  
593 thoracic CFU is calculated from the summation of all lung, lung granuloma, and thoracic LN-plated  
594 samples (Maiello et al., 2017).

595

### 596 **Flow cytometry**

597 Following processing, single cell suspensions underwent surface and TF/intracellular cytokine  
598 staining (ICS). Prior to staining, cells were incubated at 37°C in 5% CO<sub>2</sub> in RPMI supplemented  
599 with 1%HEPES, 1% L-glutamine, 10% human AB serum, and 0.1% brefeldin A (Golgiplug; BD  
600 Biosciences, San Jose, CA) for 3 hours. Cells were stained with a viability dye (Zombie NIR)  
601 followed by surface stains (Supplemental Table 3) using standard protocols. TF and ICS was  
602 performed following permeabilization using True-Nuclear buffer kit according to the  
603 recommended protocol (True-Nuclear Transcription Factor Buffer Set; BioLegend, San Diego,  
604 CA). Samples were acquired on a Cytex Aurora (Cytex, Bethesda, MD) and analyzed using  
605 FlowJo Software (BD Biosciences) (Supplemental Fig. 2) and positive staining was verified  
606 against unstained controls. Only samples with >50 flow events in the parent population were  
607 reported. For analysis of CD3<sup>-</sup>CD20<sup>-</sup> or CD20<sup>+</sup> cells, animal 6319 was excluded due to poor  
608 staining with the anti-CD20 antibody. In total, 88 granuloma samples were taken for flow  
609 cytometric analysis (early=24, mid=31, and late=33) representing 94% (average) of the original  
610 lung granulomas isolated from animals at the time of necropsy (Supplemental Table 2).

611

### 612 **Histology**



613 Individual tissue samples were formalin fixed paraffin embedded (FFPE) and cut into 5µm serial  
614 sections for tissue sectioning and histological evaluation. A veterinary pathologist (Edwin Klein)  
615 visually assessed the hematoxylin and eosin-stained lesions and described the histopathologic  
616 features and relevant cell types in each granuloma. Granuloma descriptions were categorized  
617 based on similar histopathologic description and analyzed to determine frequencies and presence  
618 of pathologic descriptors at each timepoint. Banked sections from animals with >3 granulomas  
619 having histologic descriptions were included for analyses.

620

### 621 **Immunofluorescence**

622 Cut and mounted FFPE tissue sections were treated with xylenes twice, 5 minutes each, followed  
623 by graded ethanol (95%, 70%) incubations for deparaffinization. Slides were subsequently boiled  
624 with antigen retrieval buffer (Tris-EDTA, pH9, made in house or citrate buffer, pH6, Sigma C999-  
625 1000mL) and blocked for one hour with PBS containing 1% bovine serum albumin (BSA).  
626 Following blocking, slides were incubated with primary antibodies (Supplemental Table 3) for one  
627 hour at room temperature (RT) or 18 hours at 4°C in a humidified chamber. Fluorochrome-  
628 conjugated anti-mouse, rat, or rabbit antibodies, purchased from Jackson ImmunoResearch  
629 (Jackson ImmunoResearch Laboratories, West Grove, PA) and Thermo Fisher (Thermo Fisher,  
630 Waltham, MA), were used for secondary labeling for one hour at RT in a humidified chamber.  
631 Coverslips were mounted using ProLong Gold Antifade Mounting Medium with DAPI (Thermo  
632 Fisher) and imaged using an Olympus FV1000 confocal microscope (Olympus, Center Valley,  
633 PA) or Nikon e1000 (Nikon, Melville, NY) epifluorescent microscope. Post processing, images  
634 obtained on the Olympus confocal were stitched in Photoshop (Adobe Systems, Mountain View,  
635 CA) and images taken from both microscopes were brightened by applying a linear adjustment to  
636 the histogram levels for all channels in the entire image, taking care to maintain the integrity of  
637 the original image. Supplemental table 4 lists granulomas used for immunofluorescent analysis  
638 designated by figure.

639

## 640 **Statistical analysis and transformations**

641 Adjusted cell counts were determined based on the hemocytometer count at the time of tissue  
642 homogenization (cells/mL) multiplied by the total volume of the sample. This value was then  
643 adjusted for sample splitting (for staining controls) and cutting (roughly half sent for histology).  
644 Lastly, a limit of detection value (LOD) determined by total volume of sample was added to all  
645 samples to account for those that fall below detectable levels. Kruskal-Wallis tests were  
646 performed to determine if there were differences in necropsy timepoint followed by Dunn's  
647 multiple comparison tests to determine differences between specific groups. Non-parametric  
648 paired t tests were performed to compare frequencies of cytokine production from TF<sup>+</sup> cells and  
649 TF<sup>-</sup> cells within the same sample. For all tests, P values <0.05 were considered significant. CFU  
650 was log transformed (CFU+1/granuloma) to eliminate any zeroes from the analysis. Statistical  
651 analyses were performed using GraphPad Prism 9 (GraphPad Software, San Diego, CA).

652

653 **Supplementary Figure 1: Pathology and CFU in original granulomas.** (A) A range of  
654 granuloma pathologies is seen in original lesions across timepoints post-infection. (B) Individual  
655 granuloma CFU from fibrotic and non-fibrotic original granulomas isolated at mid and late  
656 timepoints. Statistics were performed using a Mann-Whitney test with p values noted on graph.  
657 (C) The proportion of sterile granulomas at each timepoint with total granuloma numbers  
658 assessed listed below (left). The proportion of fibrotic, neutrophilic, collagenic, or necrotic of the  
659 sterile granulomas from all timepoints (11 total)(right).

660

## 661 **Supplementary figure 2: Flow cytometry gating strategy for lung granulomas**

662 (A) Identification of live events, singlets, and myeloid and lymphoid populations. (B) From the  
663 lymphocyte parent gate, identification of B cells, innate lymphocytes (ILCs) and T cells using CD3<sup>+</sup>  
664 and CD20<sup>+</sup>. Examples of transcription factor, activation marker, and pro-inflammatory cytokine

665 gating. (C) From the CD3<sup>+</sup> parent gate, identification of CD4<sup>+</sup>, CD4<sup>+</sup>CD8<sup>+</sup>, CD8<sup>+</sup>, and CD4<sup>+</sup>CD8<sup>-</sup>  
666 lymphocytes. Example of gating on transcription factor<sup>+</sup> cells versus transcription factor<sup>-</sup> cells and  
667 then gating on pro-inflammatory cytokines. (D) From the myeloid gate, an example of CD11b  
668 versus CD11c to determine single, negative, and co-expressing populations. Examples of single  
669 identification of CD11c, CD11b, and CD163 from the myeloid parent gate.

670

671 **Supplementary figure 3: Mid and late granulomas have lower proportions of CD11c<sup>+</sup> and**  
672 **CD11b<sup>+</sup> myeloid cells but higher levels of IL-10.** (A) Frequency and numbers of myeloid cells  
673 in granulomas from each timepoint. (B) Relative frequency of the combinations of CD11c and  
674 CD11b expression in myeloid cells from each timepoint where each bar represents a granuloma  
675 and animals are represented by horizontal bars (Fig. 1B). (C) Frequencies of CD11b, CD11c, and  
676 CD163 expression in myeloid cells across timepoints. (D) Cytokine expression in myeloid cells  
677 across timepoints. For A, C and D, individual points represent granulomas and animals are  
678 denoted by color. For A, C and D statistics, Kruskal Wallis tests were performed with Dunn's  
679 multiple comparisons-adjusted p values reported on graphs.

680

681 **Supplementary figure 4: Lymphocytes produce low levels of pro-inflammatory cytokines**  
682 **at all timepoints despite changes in activation marker expression.** Pro-inflammatory cytokine  
683 and activation marker expression in (A) lymphocytes, (B) T cells: CD3<sup>+</sup>CD4<sup>+</sup>, CD3<sup>+</sup>CD4<sup>+</sup>CD8<sup>+</sup>,  
684 CD3<sup>+</sup>CD8<sup>+</sup>, and (C) CD3<sup>-</sup>CD20<sup>-</sup> cells. Kruskal Wallis tests were performed with Dunn's multiple  
685 comparisons-adjusted p values reported on graphs.

686

687 **Supplementary figure 5: Transcription factor<sup>+</sup> lymphocyte subpopulations in original**  
688 **granulomas over time.** Single or double transcription factor expression in (A) CD4<sup>+</sup>, (B)  
689 CD3<sup>+</sup>CD4<sup>+</sup>CD8<sup>+</sup>, (C) CD3<sup>+</sup>CD8<sup>+</sup>, (D) CD3<sup>+</sup>CD4<sup>-</sup>CD8<sup>-</sup>, (E) CD20<sup>+</sup>, (F) CD3<sup>-</sup>CD20<sup>-</sup> cells. (G)  
690 Frequency of dual expression of T-bet and RORa (left) or T-bet and GATA3 (right) in all

691 lymphocytes. Kruskal Wallis tests were performed with Dunn's multiple comparisons-adjusted p  
692 values reported on graphs.

693

694 **Supplementary figure 6: Immunofluorescence staining for ROR $\alpha$ , GATA3, Foxp3, and**

695 **Granzyme B in granulomas.** (A) Immunofluorescence for ROR $\alpha$  (red, arrows in inset) in an early

696 timepoint granuloma can be observed (although rare) within CD3<sup>+</sup> (green) cells. (B)

697 Immunofluorescence for GATA3 (red, arrows in inset) in a late timepoint granuloma can be

698 observed (although rare) within CD3<sup>+</sup> (green) cells. (C) Foxp3 (blue) within CD3<sup>+</sup> (green) CD4<sup>+</sup>

699 (red) cells in a mid timepoint granuloma. (D) Granzyme B immunofluorescence staining in a late

700 timepoint granuloma is observed within CD3<sup>+</sup> (green) Tbet<sup>+</sup> (blue) cells as indicated by arrows.

701

702 **Supplementary figure 7: Pro-inflammatory cytokine expression is higher in T-bet<sup>+</sup> CD3<sup>-</sup>**

703 **CD20<sup>-</sup> cells.** Frequency of IFN- $\gamma$  and TNF in T-bet<sup>+</sup> or T-bet<sup>-</sup> CD3<sup>-</sup>CD20<sup>-</sup> cells in granulomas from

704 the 4 week timepoint. Statistics performed using Wilcoxon signed-rank with p values reported on

705 graph.

706

707 **Supplementary table 1: Animal and *Mtb* infection data**

708 **Supplementary table 2: Granulomas used for flow cytometry analysis**

709 **Supplementary table 3: List of antibodies used to identify cellular populations**

710 **Supplementary table 4: Granulomas used for IHC and immunofluorescence, designated by**

711 **figure**

712

713

714 REFERENCES

715

- 716 2020. Global Tuberculosis Report 2020. *In*: ORGANIZATION, W. H. (ed.). Geneva.
- 717 ABOU-ZEID, C., GARES, M. P., INWALD, J., JANSSEN, R., ZHANG, Y., YOUNG, D. B., HETZEL, C.,  
718 LAMB, J. R., BALDWIN, S. L., ORME, I. M., YEREMEEV, V., NIKONENKO, B. V. & APT, A. S.  
719 1997. Induction of a type 1 immune response to a recombinant antigen from  
720 Mycobacterium tuberculosis expressed in Mycobacterium vaccae. *Infection and*  
721 *Immunity*, 65, 1856-1862.
- 722 ARDAIN, A., DOMINGO-GONZALEZ, R., DAS, S., KAZER, S. W., HOWARD, N. C., SINGH, A.,  
723 AHMED, M., NHAMOYEBONDE, S., RANGEL-MORENO, J., OGONGO, P., LU, L.,  
724 RAMSURAN, D., DE LA LUZ GARCIA-HERNANDEZ, M., KULLAND, T., DARBY, M., PARK, E.,  
725 KARIM, F., MELOCCHI, L., MADANSEIN, R., DULLABH, K. J., DUNLAP, M., MARIN-  
726 AGUDELO, N., EBIHARA, T., NDUNG'U, T., KAUSHAL, D., PYM, A. S., KOLLS, J. K., STEYN,  
727 A., ZÚÑIGA, J., HORSNELL, W., YOKOYAMA, W. M., SHALEK, A. K., KLØVERPRIS, H. N.,  
728 COLONNA, M., LESLIE, A. & KHADER, S. A. 2019. Group 3 innate lymphoid cells mediate  
729 early protective immunity against tuberculosis. *Nature*, 570, 528-532.
- 730 BARBER, D. L., WHERRY, E. J., MASOPUST, D., ZHU, B., ALLISON, J. P., SHARPE, A. H., FREEMAN,  
731 G. J. & AHMED, R. 2006. Restoring function in exhausted CD8 T cells during chronic viral  
732 infection. *Nature*, 439, 682-687.
- 733 BARBERIS, I., BRAGAZZI, N. L., GALLUZZO, L. & MARTINI, M. 2017. The history of tuberculosis:  
734 from the first historical records to the isolation of Koch's bacillus. *Journal of preventive*  
735 *medicine and hygiene*, 58, E9-E12.
- 736 BHARAT, A., BHORADE, S. M., MORALES-NEBRED, L., MCQUATTIE-PIMENTEL, A. C.,  
737 SOBERANES, S., RIDGE, K., DECAMP, M. M., MESTAN, K. K., PERLMAN, H., BUDINGER, G.  
738 R. S. & MISHARIN, A. V. 2016. Flow Cytometry Reveals Similarities Between Lung  
739 Macrophages in Humans and Mice. *American journal of respiratory cell and molecular*  
740 *biology*, 54, 147-149.
- 741 CAPUANO, S. V., 3RD, CROIX, D. A., PAWAR, S., ZINOVIK, A., MYERS, A., LIN, P. L., BISSEL, S.,  
742 FUHRMAN, C., KLEIN, E. & FLYNN, J. L. 2003a. Experimental Mycobacterium tuberculosis  
743 infection of cynomolgus macaques closely resembles the various manifestations of  
744 human M. tuberculosis infection. *Infect Immun*, 71, 5831-44.
- 745 CAPUANO, S. V., 3RD, CROIX, D. A., PAWAR, S., ZINOVIK, A., MYERS, A., LIN, P. L., BISSEL, S.,  
746 FUHRMAN, C., KLEIN, E. & FLYNN, J. L. 2003b. Experimental Mycobacterium tuberculosis  
747 infection of cynomolgus macaques closely resembles the various manifestations of  
748 human M. tuberculosis infection. *Infection and immunity*, 71, 5831-5844.
- 749 CIBRIÁN, D. & SÁNCHEZ-MADRID, F. 2017. CD69: from activation marker to metabolic  
750 gatekeeper. *European journal of immunology*, 47, 946-953.
- 751 CLÉNET, M.-L., GAGNON, F., MORATALLA, A. C., VIEL, E. C. & ARBOUR, N. 2017. Peripheral  
752 human CD4+CD8+ T lymphocytes exhibit a memory phenotype and enhanced responses  
753 to IL-2, IL-7 and IL-15. *Scientific Reports*, 7, 11612.
- 754 COHEN, S. B., GERN, B. H., DELAHAYE, J. L., ADAMS, K. N., PLUMLEE, C. R., WINKLER, J. K.,  
755 SHERMAN, D. R., GERNER, M. Y. & URDAHL, K. B. 2018. Alveolar Macrophages Provide  
756 an Early Mycobacterium tuberculosis Niche and Initiate Dissemination. *Cell Host*  
757 *Microbe*, 24, 439-446.e4.
- 758 COLEMAN, M. T., CHEN, R. Y., LEE, M., LIN, P. L., DODD, L. E., MAIELLO, P., VIA, L. E., KIM, Y.,  
759 MARRINER, G., DARTOIS, V., SCANGA, C., JANSSEN, C., WANG, J., KLEIN, E., CHO, S. N.,

- 760 BARRY, C. E., 3RD & FLYNN, J. L. 2014a. PET/CT imaging reveals a therapeutic response  
761 to oxazolidinones in macaques and humans with tuberculosis. *Science translational*  
762 *medicine*, 6, 265ra167-265ra167.
- 763 COLEMAN, M. T., MAIELLO, P., TOMKO, J., FRYE, L. J., FILLMORE, D., JANSSEN, C., KLEIN, E. &  
764 LIN, P. L. 2014b. Early Changes by (18)Fluorodeoxyglucose positron emission  
765 tomography coregistered with computed tomography predict outcome after  
766 Mycobacterium tuberculosis infection in cynomolgus macaques. *Infect Immun*, 82,  
767 2400-4.
- 768 DARRAH, P. A., DIFAZIO, R. M., MAIELLO, P., GIDEON, H. P., MYERS, A. J., RODGERS, M. A.,  
769 HACKNEY, J. A., LINDENSTROM, T., EVANS, T., SCANGA, C. A., PRIKHODKO, V.,  
770 ANDERSEN, P., LIN, P. L., LADDY, D., ROEDERER, M., SEDER, R. A. & FLYNN, J. L. 2019.  
771 Boosting BCG with proteins or rAd5 does not enhance protection against tuberculosis in  
772 rhesus macaques. *npj Vaccines*, 4, 21.
- 773 DARRAH, P. A., ZEPPA, J. J., MAIELLO, P., HACKNEY, J. A., WADSWORTH, M. H., HUGHES, T. K.,  
774 POKKALI, S., SWANSON, P. A., GRANT, N. L., RODGERS, M. A., KAMATH, M., CAUSGROVE,  
775 C. M., LADDY, D. J., BONAVIA, A., CASIMIRO, D., LIN, P. L., KLEIN, E., WHITE, A. G.,  
776 SCANGA, C. A., SHALEK, A. K., ROEDERER, M., FLYNN, J. L. & SEDER, R. A. 2020.  
777 Prevention of tuberculosis in macaques after intravenous BCG immunization. *Nature*,  
778 577, 95-102.
- 779 DE MARTINO, M., LODI, L., GALLI, L. & CHIAPPINI, E. 2019. Immune Response to Mycobacterium  
780 tuberculosis: A Narrative Review. *Frontiers in Pediatrics*, 7.
- 781 DIEDRICH, C. R., GIDEON, H. P., RUTLEDGE, T., BARANOWSKI, T. M., MAIELLO, P., MYERS, A. J. &  
782 LIN, P. L. 2019. CD4CD8 Double Positive T cell responses during Mycobacterium  
783 tuberculosis infection in cynomolgus macaques. *Journal of medical primatology*, 48, 82-  
784 89.
- 785 DIJKMAN, K., SOMBROEK, C. C., VERVENNE, R. A. W., HOFMAN, S. O., BOOT, C., REMARQUE, E.  
786 J., KOCKEN, C. H. M., OTTENHOFF, T. H. M., KONDOVA, I., KHAYUM, M. A., HAANSTRA, K.  
787 G., VIERBOOM, M. P. M. & VERRECK, F. A. W. 2019. Prevention of tuberculosis infection  
788 and disease by local BCG in repeatedly exposed rhesus macaques. *Nat Med*, 25, 255-  
789 262.
- 790 DOMINGO-GONZALEZ, R., DAS, S., GRIFFITHS, K. L., AHMED, M., BAMBOUSKOVA, M., GOPAL,  
791 R., GONDI, S., MUÑOZ-TORRICO, M., SALAZAR-LEZAMA, M. A., CRUZ-LAGUNAS, A.,  
792 JIMÉNEZ-ÁLVAREZ, L., RAMIREZ-MARTINEZ, G., ESPINOSA-SOTO, R., SULTANA, T.,  
793 LYONS-WEILER, J., REINHART, T. A., ARCOS, J., DE LA LUZ GARCIA-HERNANDEZ, M.,  
794 MASTRANGELO, M. A., AL-HAMMADI, N., TOWNSEND, R., BALADA-LLASAT, J.-M.,  
795 TORRELLES, J. B., KAPLAN, G., HORNE, W., KOLLS, J. K., ARTYOMOV, M. N., RANGEL-  
796 MORENO, J., ZÚÑIGA, J. & KHADER, S. A. 2017. Interleukin-17 limits hypoxia-inducible  
797 factor 1 $\alpha$  and development of hypoxic granulomas during tuberculosis. *JCI insight*, 2,  
798 e92973.
- 799 DONG, Y., LI, X., ZHANG, L., ZHU, Q., CHEN, C., BAO, J. & CHEN, Y. 2019. CD4(+) T cell exhaustion  
800 revealed by high PD-1 and LAG-3 expression and the loss of helper T cell function in  
801 chronic hepatitis B. *BMC immunology*, 20, 27-27.

- 802 FANG, D. & ZHU, J. 2017. Dynamic balance between master transcription factors determines  
803 the fates and functions of CD4 T cell and innate lymphoid cell subsets. *Journal of*  
804 *Experimental Medicine*, 214, 1861-1876.
- 805 FERREIRA, A. C. F., SZETO, A. C. H., HEYCOCK, M. W. D., CLARK, P. A., WALKER, J. A., CRISP, A.,  
806 BARLOW, J. L., KITCHING, S., LIM, A., GOGOI, M., BERKS, R., DALY, M., JOLIN, H. E. &  
807 MCKENZIE, A. N. J. 2021. ROR $\alpha$  is a critical checkpoint for T cell and ILC2 commitment in  
808 the embryonic thymus. *Nature Immunology*, 22, 166-178.
- 809 FLYNN, J. F., KLEIN, E. 2011. Pulmonary Tuberculosis in Monkeys. *A Color Atlas of Comparative*  
810 *Pulmonary Tuberculosis Histopathology (Leong, J., Datois, V., Dick T., eds)*. Boca Raton,  
811 FL: Taylor and Francis Publishers.
- 812 FLYNN, J. L., CHAN, J. & LIN, P. L. 2011. Macrophages and control of granulomatous  
813 inflammation in tuberculosis. *Mucosal Immunology*, 4, 271-278.
- 814 FLYNN, J. L., GIDEON, H. P., MATTILA, J. T. & LIN, P. L. 2015. Immunology studies in non-human  
815 primate models of tuberculosis. *Immunological reviews*, 264, 60-73.
- 816 FREEMAN, G. J., LONG, A. J., IWAI, Y., BOURQUE, K., CHERNOVA, T., NISHIMURA, H., FITZ, L. J.,  
817 MALENKOVICH, N., OKAZAKI, T., BYRNE, M. C., HORTON, H. F., FOUSSER, L., CARTER, L.,  
818 LING, V., BOWMAN, M. R., CARRENO, B. M., COLLINS, M., WOOD, C. R. & HONJO, T.  
819 2000. Engagement of the PD-1 immunoinhibitory receptor by a novel B7 family member  
820 leads to negative regulation of lymphocyte activation. *The Journal of experimental*  
821 *medicine*, 192, 1027-1034.
- 822 GALLEGOS, A. M., VAN HEIJST, J. W., SAMSTEIN, M., SU, X., PAMER, E. G. & GLICKMAN, M. S.  
823 2011. A gamma interferon independent mechanism of CD4 T cell mediated control of M.  
824 tuberculosis infection in vivo. *PLoS Pathog*, 7, e1002052.
- 825 GIDEON, H. P., HUGHES, T. K., WADSWORTH, M. H., TU, A. A., GIERAHN, T. M., PETERS, J. M.,  
826 HOPKINS, F. F., WEI, J.-R., KUMMERLOWE, C., GRANT, N. L., NARGAN, K., PHUAH, J.,  
827 BORISH, H. J., MAIELLO, P., WHITE, A. G., WINCHELL, C. G., NYQUIST, S. K., GANCHUA, S.  
828 K. C., MYERS, A., PATEL, K. V., AMEEL, C. L., COCHRAN, C. T., IBRAHIM, S., TOMKO, J. A.,  
829 FRYE, L. J., ROSENBERG, J. M., SHIH, A., CHAO, M., SCANGA, C. A., ORDOVAS-  
830 MONTANES, J., BERGER, B., MATTILA, J. T., MADANSEIN, R., LOVE, J. C., LIN, P. L., LESLIE,  
831 A., BEHAR, S. M., BRYSON, B., FLYNN, J. L., FORTUNE, S. M. & SHALEK, A. K. 2021.  
832 Multimodal profiling of lung granulomas reveals cellular correlates of tuberculosis  
833 control. *bioRxiv*, 2020.10.24.352492.
- 834 GIDEON, H. P., PHUAH, J., JUNECKO, B. A. & MATTILA, J. T. 2019. Neutrophils express pro- and  
835 anti-inflammatory cytokines in granulomas from Mycobacterium tuberculosis-infected  
836 cynomolgus macaques. *Mucosal Immunology*, 12, 1370-1381.
- 837 GIDEON, H. P., PHUAH, J., MYERS, A. J., BRYSON, B. D., RODGERS, M. A., COLEMAN, M. T.,  
838 MAIELLO, P., RUTLEDGE, T., MARINO, S., FORTUNE, S. M., KIRSCHNER, D. E., LIN, P. L. &  
839 FLYNN, J. L. 2015. Variability in tuberculosis granuloma T cell responses exists, but a  
840 balance of pro- and anti-inflammatory cytokines is associated with sterilization. *PLoS*  
841 *Pathog*, 11, e1004603.
- 842 GREEN, A. M., DIFAZIO, R. & FLYNN, J. L. 2013. IFN- $\gamma$  from CD4 T cells is essential for host  
843 survival and enhances CD8 T cell function during Mycobacterium tuberculosis infection.  
844 *J Immunol*, 190, 270-7.

- 845 GRIFFITHS, K. L., VILLARREAL, D. O., WEINER, D. B. & KHADER, S. A. 2016. A novel multivalent  
846 tuberculosis vaccine confers protection in a mouse model of tuberculosis. *Human*  
847 *Vaccines & Immunotherapeutics*, 12, 2649-2653.
- 848 HAIM-VILMOVSKY, L., HENRIKSSON, J., WALKER, J. A., MIAO, Z., NATAN, E., KAR, G., CLARE, S.,  
849 BARLOW, J. L., CHARIDEMOU, E., MAMANOVA, L., CHEN, X., PROSERPIO, V., PRAMANIK,  
850 J., WOODHOUSE, S., PROTASIO, A. V., EFREMOVA, M., GRIFFIN, J. L., BERRIMAN, M.,  
851 DOUGAN, G., FISHER, J., MARIONI, J. C., MCKENZIE, A. N. J. & TEICHMANN, S. A. 2021.  
852 Mapping Rora expression in resting and activated CD4+ T cells. *PloS one*, 16, e0251233-  
853 e0251233.
- 854 HANSEN, S. G., ZAK, D. E., XU, G., FORD, J. C., MARSHALL, E. E., MALOULI, D., GILBRIDE, R. M.,  
855 HUGHES, C. M., VENTURA, A. B., AINSLIE, E., RANDALL, K. T., SELSETH, A. N.,  
856 RUNDSTROM, P., HERLACHE, L., LEWIS, M. S., PARK, H., PLANER, S. L., TURNER, J. M.,  
857 FISCHER, M., ARMSTRONG, C., ZWEIG, R. C., VALVO, J., BRAUN, J. M., SHANKAR, S., LU,  
858 L., SYLWESTER, A. W., LEGASSE, A. W., MESSERLE, M., JARVIS, M. A., AMON, L. M.,  
859 ADEREM, A., ALTER, G., LADDY, D. J., STONE, M., BONAVIA, A., EVANS, T. G., AXTHELM,  
860 M. K., FRÜH, K., EDLEFSEN, P. T. & PICKER, L. J. 2018. Prevention of tuberculosis in  
861 rhesus macaques by a cytomegalovirus-based vaccine. *Nat Med*, 24, 130-143.
- 862 HORI, S., NOMURA, T. & SAKAGUCHI, S. 2003. Control of regulatory T cell development by the  
863 transcription factor Foxp3. *Science*, 299, 1057-61.
- 864 IVANOV, II, MCKENZIE, B. S., ZHOU, L., TADOKORO, C. E., LEPELLEY, A., LAFAILLE, J. J., CUA, D. J.  
865 & LITTMAN, D. R. 2006. The orphan nuclear receptor ROR $\gamma$  directs the  
866 differentiation program of proinflammatory IL-17+ T helper cells. *Cell*, 126, 1121-33.
- 867 KAUFFMAN, K. D., SALLIN, M. A., SAKAI, S., KAMENYEVA, O., KABAT, J., WEINER, D., SUTPHIN,  
868 M., SCHIMEL, D., VIA, L., BARRY, C. E., WILDER-KOFIE, T., MOORE, I., MOORE, R. &  
869 BARBER, D. L. 2018. Defective positioning in granulomas but not lung-homing limits CD4  
870 T-cell interactions with Mycobacterium tuberculosis-infected macrophages in rhesus  
871 macaques. *Mucosal Immunology*, 11, 462-473.
- 872 KHADER, S. A., BELL, G. K., PEARL, J. E., FOUNTAIN, J. J., RANGEL-MORENO, J., CILLEY, G. E.,  
873 SHEN, F., EATON, S. M., GAFFEN, S. L., SWAIN, S. L., LOCKSLEY, R. M., HAYNES, L.,  
874 RANDALL, T. D. & COOPER, A. M. 2007. IL-23 and IL-17 in the establishment of protective  
875 pulmonary CD4+ T cell responses after vaccination and during Mycobacterium  
876 tuberculosis challenge. *Nature Immunology*, 8, 369-377.
- 877 KUMAR, P. 2017. IFN $\gamma$ -producing CD4(+) T lymphocytes: the double-edged swords in  
878 tuberculosis. *Clinical and translational medicine*, 6, 21-21.
- 879 LAZAREVIC, V., GLIMCHER, L. H. & LORD, G. M. 2013. T-bet: a bridge between innate and  
880 adaptive immunity. *Nature Reviews Immunology*, 13, 777-789.
- 881 LIN, P. L., COLEMAN, T., CARNEY, J. P., LOPRESTI, B. J., TOMKO, J., FILLMORE, D., DARTOIS, V.,  
882 SCANGA, C., FRYE, L. J., JANSSEN, C., KLEIN, E., BARRY, C. E., 3RD & FLYNN, J. L. 2013.  
883 Radiologic Responses in Cynomolgus Macaques for Assessing Tuberculosis  
884 Chemotherapy Regimens. *Antimicrob Agents Chemother*, 57, 4237-4244.
- 885 LIN, P. L., FORD, C. B., COLEMAN, M. T., MYERS, A. J., GAWANDE, R., IOERGER, T., SACCHETTINI,  
886 J., FORTUNE, S. M. & FLYNN, J. A. L. 2014. Sterilization of granulomas is common in both  
887 active and latent tuberculosis despite extensive within-host variability in bacterial killing.  
888 *Nat Med*, 20, 75-9.



- 889 LIN, P. L., RODGERS, M., SMITH, L., KNEITAH, BIGBEE, M., MYERS, A., BIGBEE, C., CHIOSEA, I.,  
890 CAPUANO, S. V., FUHRMAN, C., KLEIN, E. & FLYNN, J. L. 2009. Quantitative Comparison  
891 of Active and Latent Tuberculosis in the Cynomolgus Macaque Model. *Infection and*  
892 *Immunity*, 77, 4631.
- 893 LIN, P. L., RUTLEDGE, T., GREEN, A. M., BIGBEE, M., FUHRMAN, C., KLEIN, E. & FLYNN, J. L. 2012.  
894 CD4 T cell depletion exacerbates acute Mycobacterium tuberculosis while reactivation  
895 of latent infection is dependent on severity of tissue depletion in cynomolgus macaques.  
896 *AIDS research and human retroviruses*, 28, 1693-1702.
- 897 LO, B. C., CANALS HERNAEZ, D., SCOTT, R. W., HUGHES, M. R., SHIN, S. B., UNDERHILL, T. M.,  
898 TAKEI, F. & MCNAGNY, K. M. 2019. The Transcription Factor ROR $\alpha$  Preserves ILC3  
899 Lineage Identity and Function during Chronic Intestinal Infection. *The Journal of*  
900 *Immunology*, ji1900781.
- 901 LORD, G. M., RAO, R. M., CHOE, H., SULLIVAN, B. M., LICHTMAN, A. H., LUSCINSKAS, F. W. &  
902 GLIMCHER, L. H. 2005. T-bet is required for optimal proinflammatory CD4+ T-cell  
903 trafficking. *Blood*, 106, 3432-9.
- 904 LUKÁCSI, S., GERECSEI, T., BALÁZS, K., FRAN CZ, B., SZABÓ, B., ERDEI, A. & BAJTAY, Z. 2020. The  
905 differential role of CR3 (CD11b/CD18) and CR4 (CD11c/CD18) in the adherence,  
906 migration and podosome formation of human macrophages and dendritic cells under  
907 inflammatory conditions. *PLOS ONE*, 15, e0232432.
- 908 MAIELLO, P., DIFAZIO, R. M., CADENA, A. M., RODGERS, M. A., LIN, P. L., SCANGA, C. A. &  
909 FLYNN, J. L. 2017. Rhesus macaques are more susceptible to progressive tuberculosis  
910 than cynomolgus macaques: A quantitative comparison. *Infection and Immunity*.
- 911 MARINO, S., EL-KEBIR, M. & KIRSCHNER, D. 2011. A hybrid multi-compartment model of  
912 granuloma formation and T cell priming in tuberculosis. *Journal of theoretical biology*,  
913 280, 50-62.
- 914 MARTIN, C. J., CADENA, A. M., LEUNG, V. W., LIN, P. L., MAIELLO, P., HICKS, N., CHASE, M. R.,  
915 FLYNN, J. L. & FORTUNE, S. M. 2017. Digitally Barcoding Mycobacterium tuberculosis  
916 Reveals In Vivo Infection Dynamics in the Macaque Model of Tuberculosis. *mBio*, 8.
- 917 MCLANE, L. M., BANERJEE, P. P., COSMA, G. L., MAKEDONAS, G., WHERRY, E. J., ORANGE, J. S. &  
918 BETTS, M. R. 2013. Differential localization of T-bet and Eomes in CD8 T cell memory  
919 populations. *J Immunol*, 190, 3207-15.
- 920 MCLANE, L. M., NGIOW, S. F., CHEN, Z., ATTANASIO, J., MANNE, S., RUTHEL, G., WU, J. E.,  
921 STAUPPE, R. P., XU, W., AMARAVADI, R. K., XU, X., KARAKOUSIS, G. C., MITCHELL, T. C.,  
922 SCHUCHTER, L. M., HUANG, A. C., FREEDMAN, B. D., BETTS, M. R. & WHERRY, E. J. 2021.  
923 Role of nuclear localization in the regulation and function of T-bet and Eomes in  
924 exhausted CD8 T cells. *Cell Reports*, 35, 109120.
- 925 MEHRA, S., PAHAR, B., DUTTA, N. K., CONERLY, C. N., PHILIPPI-FALKENSTEIN, K., ALVAREZ, X. &  
926 KAUSHAL, D. 2010. Transcriptional reprogramming in nonhuman primate (rhesus  
927 macaque) tuberculosis granulomas. *PloS one*, 5, e12266-e12266.
- 928 MILLAR, J. A., BUTLER, J. R., EVANS, S., MATTILA, J. T., LINDERMAN, J. J., FLYNN, J. L. &  
929 KIRSCHNER, D. E. 2021. Spatial Organization and Recruitment of Non-Specific T Cells  
930 May Limit T Cell-Macrophage Interactions Within Mycobacterium tuberculosis  
931 Granulomas. *Frontiers in Immunology*, 11.

- 932 NEJATI MOHARRAMI, N., BJØRKØY TANDE, E., RYAN, L., ESPEVIK, T. & BOYARTCHUK, V. 2018.  
933 ROR $\alpha$  controls inflammatory state of human macrophages. *PLOS ONE*, 13, e0207374.
- 934 OKADA, S., MARKLE, J. G., DEENICK, E. K., MELE, F., AVERBUCH, D., LAGOS, M., ALZHRANI, M.,  
935 AL-MUHSEN, S., HALWANI, R., MA, C. S., WONG, N., SOUDAIS, C., HENDERSON, L. A.,  
936 MARZOUQA, H., SHAMMA, J., GONZALEZ, M., MARTINEZ-BARRICARTE, R., OKADA, C.,  
937 AVERY, D. T., LATORRE, D., DESWARTE, C., JABOT-HANIN, F., TORRADO, E., FOUNTAIN,  
938 J., BELKADI, A., ITAN, Y., BOISSON, B., MIGAUD, M., ARLEHAMN, C. S. L., SETTE, A.,  
939 BRETON, S., MCCLUSKEY, J., ROSSJOHN, J., DE VILLARTAY, J.-P., MOSHOUS, D.,  
940 HAMBLETON, S., LATOUR, S., ARKWRIGHT, P. D., PICARD, C., LANTZ, O., ENGELHARD, D.,  
941 KOBAYASHI, M., ABEL, L., COOPER, A. M., NOTARANGELO, L. D., BOISSON-DUPUIS, S.,  
942 PUEL, A., SALLUSTO, F., BUSTAMANTE, J., TANGYE, S. G. & CASANOVA, J.-L. 2015.  
943 Impairment of immunity to *Candida* and *Mycobacterium* in humans with bi-allelic RORC  
944 mutations. *Science*, 349, 606-613.
- 945 ORR, M. T., WINDISH, H. P., BEEBE, E. A., ARGILLA, D., HUANG, P.-W. D., REESE, V. A., REED, S. G.  
946 & COLER, R. N. 2015. Interferon  $\gamma$  and Tumor Necrosis Factor Are Not Essential  
947 Parameters of CD4+ T-Cell Responses for Vaccine Control of Tuberculosis. *The Journal of*  
948 *Infectious Diseases*, 212, 495-504.
- 949 PHUAH, J., WONG, E. A., GIDEON, H. P., MAIELLO, P., COLEMAN, M. T., HENDRICKS, M. R.,  
950 RUDEN, R., CIRINCIONE, L. R., CHAN, J., LIN, P. L. & FLYNN, J. L. 2016. Effects of B Cell  
951 Depletion on Early *Mycobacterium tuberculosis* Infection in *Cynomolgus* Macaques.  
952 *Infection and immunity*, 84, 1301-1311.
- 953 PRITCHARD, G. H., KEDL, R. M. & HUNTER, C. A. 2019. The evolving role of T-bet in resistance to  
954 infection. *Nature Reviews Immunology*, 19, 398-410.
- 955 REDFORD, P. S., MURRAY, P. J. & O'GARRA, A. 2011. The role of IL-10 in immune regulation  
956 during *M. tuberculosis* infection. *Mucosal Immunology*, 4, 261-270.
- 957 REILEY, W. W., SHAFIANI, S., WITTMER, S. T., TUCKER-HEARD, G., MOON, J. J., JENKINS, M. K.,  
958 URDAHL, K. B., WINSLOW, G. M. & WOODLAND, D. L. 2010. Distinct functions of  
959 antigen-specific CD4 T cells during murine &em>*Mycobacterium*  
960 *tuberculosis*&/em> infection. *Proceedings of the National Academy of Sciences*,  
961 107, 19408.
- 962 ROSSET, A., SPADOLA, L. & RATIB, O. 2004. OsiriX: An Open-Source Software for Navigating in  
963 Multidimensional DICOM Images. *Journal of Digital Imaging*, 17, 205-216.
- 964 SAINI, A., MAHAJAN, S., AHUJA, N., BHAGYARAJ, E., KALRA, R., JANMEJA, A. K. & GUPTA, P.  
965 2018. An Accord of Nuclear Receptor Expression in *M. tuberculosis* Infected  
966 Macrophages and Dendritic Cells. *Scientific reports*, 8, 2296-2296.
- 967 SULLIVAN, B. M., JOBE, O., LAZAREVIC, V., VASQUEZ, K., BRONSON, R., GLIMCHER, L. H. &  
968 KRAMNIK, I. 2005. Increased Susceptibility of Mice Lacking T-bet to Infection with  
969 &em>*Mycobacterium tuberculosis*&/em> Correlates with Increased IL-10 and  
970 Decreased IFN- $\gamma$  Production. *The Journal of Immunology*, 175, 4593.
- 971 SZABO, S. J., KIM, S. T., COSTA, G. L., ZHANG, X., FATHMAN, C. G. & GLIMCHER, L. H. 2000. A  
972 novel transcription factor, T-bet, directs Th1 lineage commitment. *Cell*, 100, 655-69.
- 973 TAMERIS, M. D., HATHERILL, M., LANDRY, B. S., SCRIBA, T. J., SNOWDEN, M. A., LOCKHART, S.,  
974 SHEA, J. E., MCCLAIN, J. B., HUSSEY, G. D., HANEKOM, W. A., MAHOMED, H. &  
975 MCSHANE, H. 2013. Safety and efficacy of MVA85A, a new tuberculosis vaccine, in

- 976 infants previously vaccinated with BCG: a randomised, placebo-controlled phase 2b trial.  
977 *Lancet*, 381, 1021-8.
- 978 VERRECK, F. A. W., VERVENNE, R. A. W., KONDOVA, I., VAN KRALINGEN, K. W., REMARQUE, E. J.,  
979 BRASKAMP, G., VAN DER WERFF, N. M., KERSBERGEN, A., OTTENHOFF, T. H. M., HEIDT,  
980 P. J., GILBERT, S. C., GICQUEL, B., HILL, A. V. S., MARTIN, C., MCSHANE, H. & THOMAS, A.  
981 W. 2009. MVA.85A Boosting of BCG and an Attenuated, *phoP* Deficient *M. tuberculosis*  
982 Vaccine Both Show Protective Efficacy Against Tuberculosis in Rhesus Macaques. *PLOS*  
983 *ONE*, 4, e5264.
- 984 WANG, N. S., MCHEYZER-WILLIAMS, L. J., OKITSU, S. L., BURRIS, T. P., REINER, S. L. &  
985 MCHEYZER-WILLIAMS, M. G. 2012. Divergent transcriptional programming of class-  
986 specific B cell memory by T-bet and ROR $\alpha$ . *Nature immunology*, 13, 604-611.
- 987 WARSINSKE, H. C., DIFAZIO, R. M., LINDERMAN, J. J., FLYNN, J. L. & KIRSCHNER, D. E. 2017.  
988 Identifying mechanisms driving formation of granuloma-associated fibrosis during  
989 *Mycobacterium tuberculosis* infection. *Journal of theoretical biology*, 429, 1-17.
- 990 WHITE, A. G., MAIELLO, P., COLEMAN, M. T., TOMKO, J. A., FRYE, L. J., SCANGA, C. A., LIN, P. L. &  
991 FLYNN, J. L. 2017. Analysis of 18FDG PET/CT Imaging as a Tool for Studying  
992 *Mycobacterium tuberculosis* Infection and Treatment in Non-human Primates. *Journal*  
993 *of visualized experiments : JoVE*, 56375.
- 994 WINCHELL, C. G., MISHRA, B. B., PHUAH, J. Y., SAQIB, M., NELSON, S. J., MAIELLO, P.,  
995 CAUSGROVE, C. M., AMEEL, C. L., STEIN, B., BORISH, H. J., WHITE, A. G., KLEIN, E. C.,  
996 ZIMMERMAN, M. D., DARTOIS, V., LIN, P. L., SASSETTI, C. M. & FLYNN, J. L. 2020.  
997 Evaluation of IL-1 Blockade as an Adjunct to Linezolid Therapy for Tuberculosis in Mice  
998 and Macaques. *Frontiers in immunology*, 11, 891-891.
- 999 WONG, E. A., JOSLYN, L., GRANT, N. L., KLEIN, E., LIN, P. L., KIRSCHNER, D. E. & FLYNN, J. L. 2018.  
1000 Low Levels of T Cell Exhaustion in Tuberculous Lung Granulomas. *Infect Immun*, 86.
- 1001 YANG, R., MELE, F., WORLEY, L., LANGLAIS, D., ROSAIN, J., BENHSAIEN, I., ELARABI, H., CROFT, C.  
1002 A., DOISNE, J.-M., ZHANG, P., WEISSHAAR, M., JARROSSAY, D., LATORRE, D., SHEN, Y.,  
1003 HAN, J., GRUBER, C., MARKLE, J., AL ALI, F., RAHMAN, M., KHAN, T., SEELEUTHNER, Y.,  
1004 KERNER, G., HUSQUIN, L. T., MACLSAAC, J. L., JELJELI, M., AILAL, F., KOBOR, M. S.,  
1005 OLEAGA-QUINTAS, C., ROYNARD, M., BOURGEY, M., EL BAGHDADI, J., BOISSON-DUPUIS,  
1006 S., PUEL, A., BATTEUX, F., ROZENBERG, F., MARR, N., PAN-HAMMARSTRÖM, Q.,  
1007 BOGUNOVIC, D., QUINTANA-MURCI, L., CARROLL, T., MA, C. S., ABEL, L., BOUSFIHA, A.,  
1008 DI SANTO, J. P., GLIMCHER, L. H., GROS, P., TANGYE, S. G., SALLUSTO, F., BUSTAMANTE,  
1009 J. & CASANOVA, J.-L. 2020. Human T-bet governs innate and innate-like adaptive IFN- $\gamma$   
1010 immunity against mycobacteria. *Cell*, 2020.08.31.274589.
- 1011 YANG, X. O., PAPPU, B. P., NURIEVA, R., AKIMZHANOV, A., KANG, H. S., CHUNG, Y., MA, L.,  
1012 SHAH, B., PANOPOULOS, A. D., SCHLUNS, K. S., WATOWICH, S. S., TIAN, Q., JETTEN, A.  
1013 M. & DONG, C. 2008. T helper 17 lineage differentiation is programmed by orphan  
1014 nuclear receptors ROR alpha and ROR gamma. *Immunity*, 28, 29-39.
- 1015 YATES, A., CALLARD, R. & STARK, J. 2004. Combining cytokine signalling with T-bet and GATA-3  
1016 regulation in Th1 and Th2 differentiation: a model for cellular decision-making. *J Theor*  
1017 *Biol*, 231, 181-96.
- 1018 ZHENG, W.-P. & FLAVELL, R. A. 1997. The Transcription Factor GATA-3 Is Necessary and  
1019 Sufficient for Th2 Cytokine Gene Expression in CD4 T Cells. *Cell*, 89, 587-596.

1020 ZIEGLER, S. F., RAMSDELL, F. & ALDERSON, M. R. 1994. The activation antigen CD69. *Stem Cells*,  
1021 12, 456-65.  
1022

A.

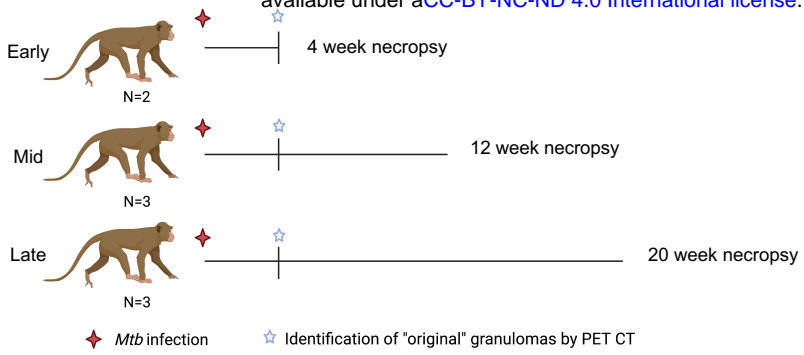

B.

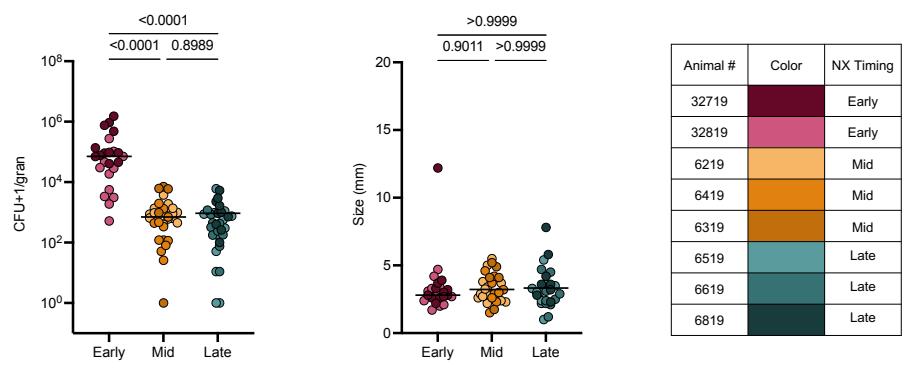

C.

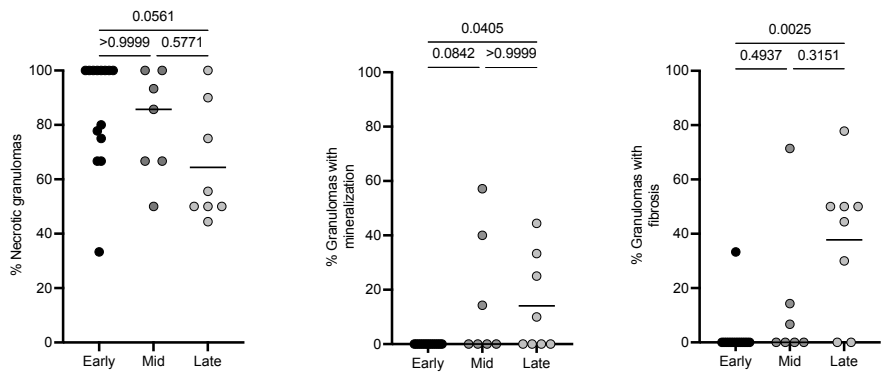

D.

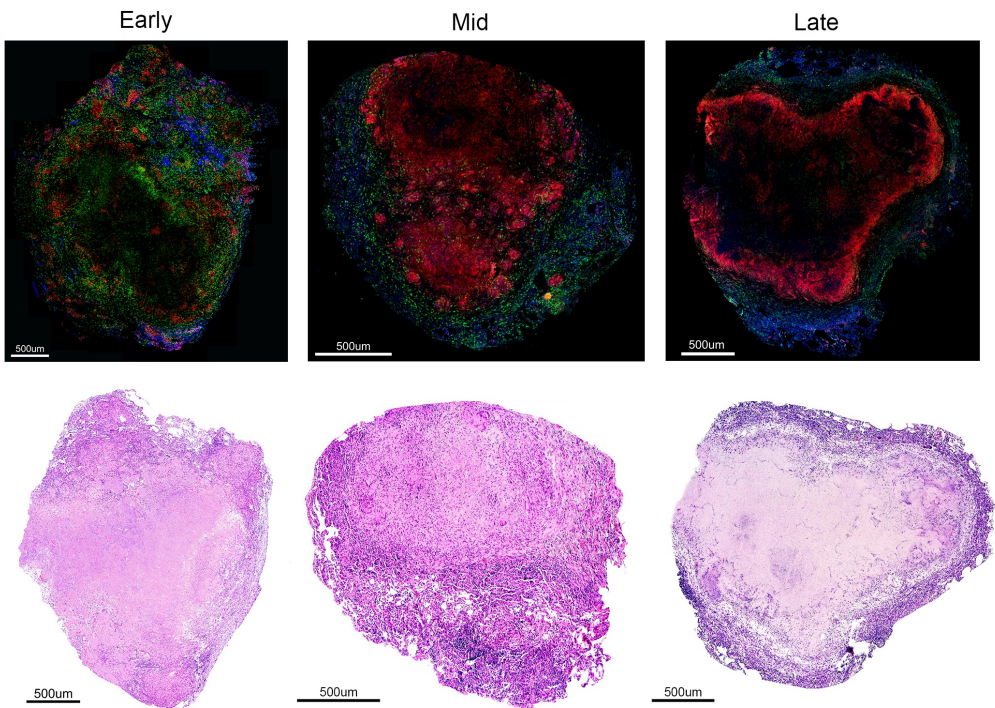

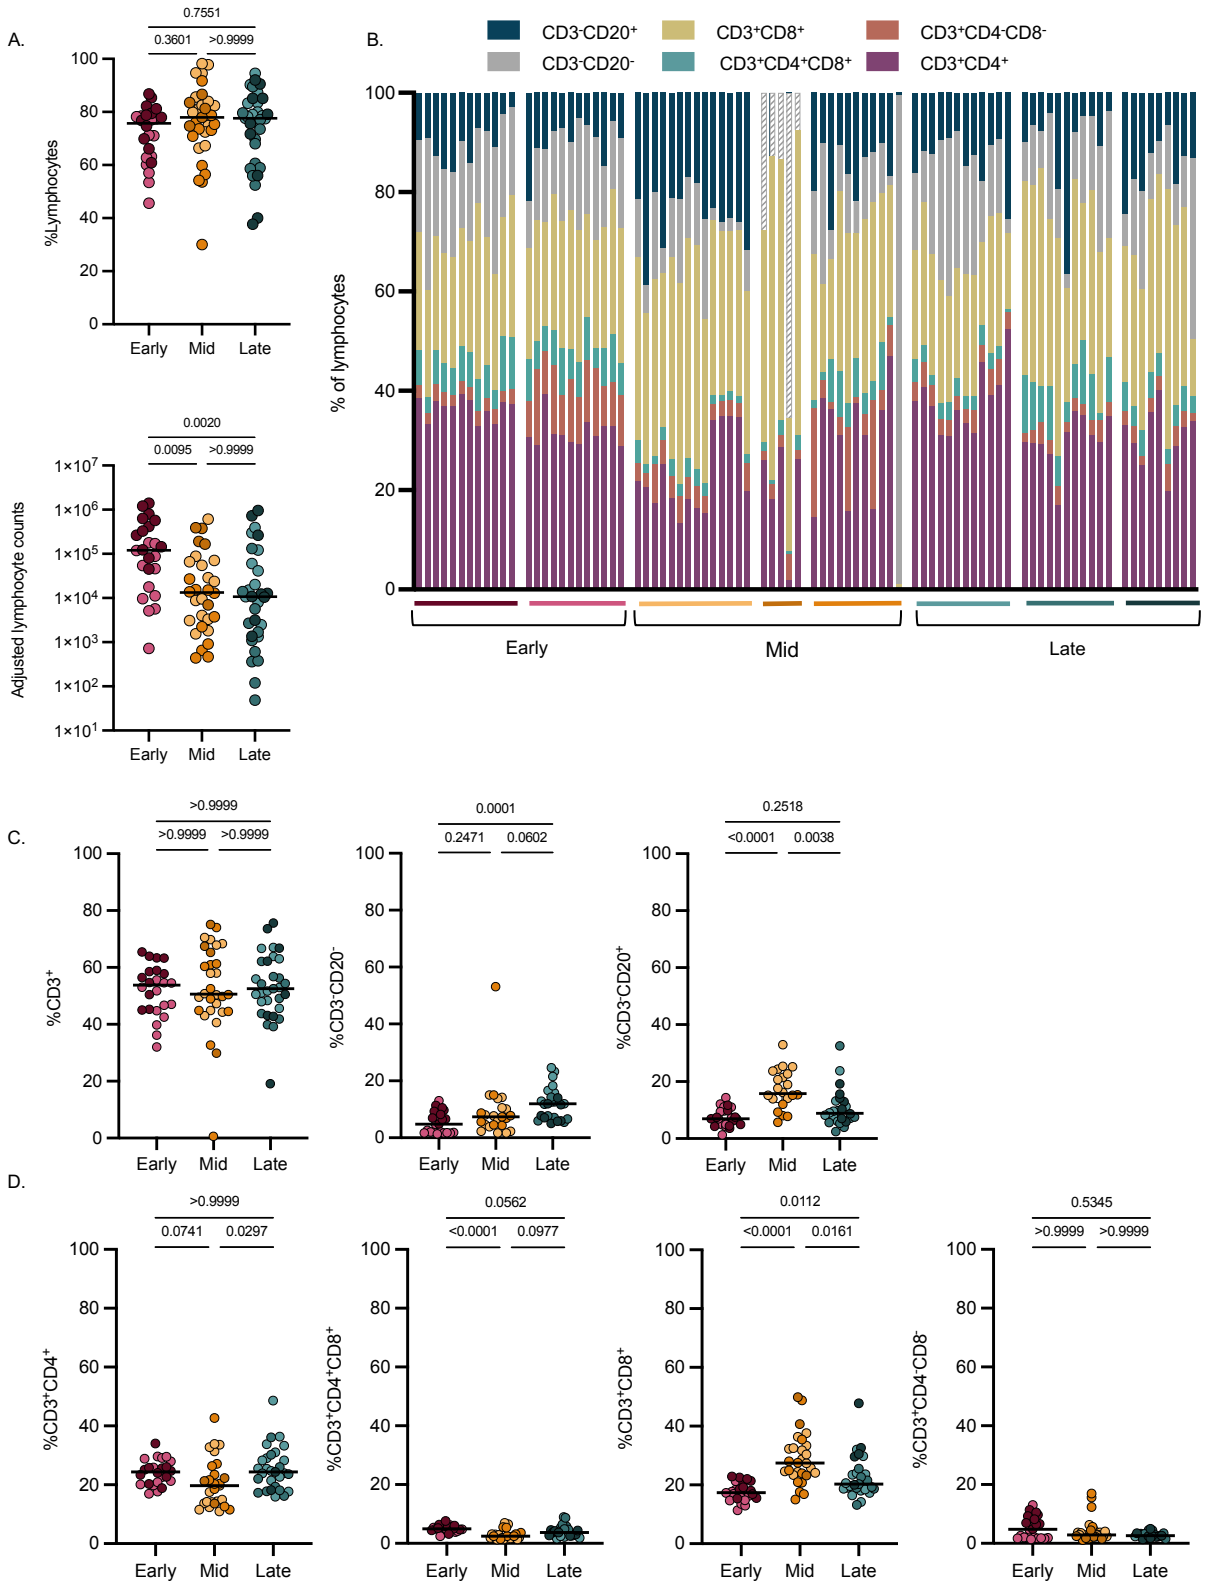

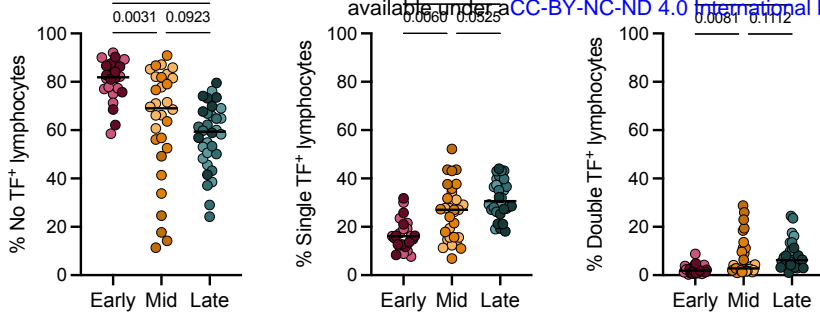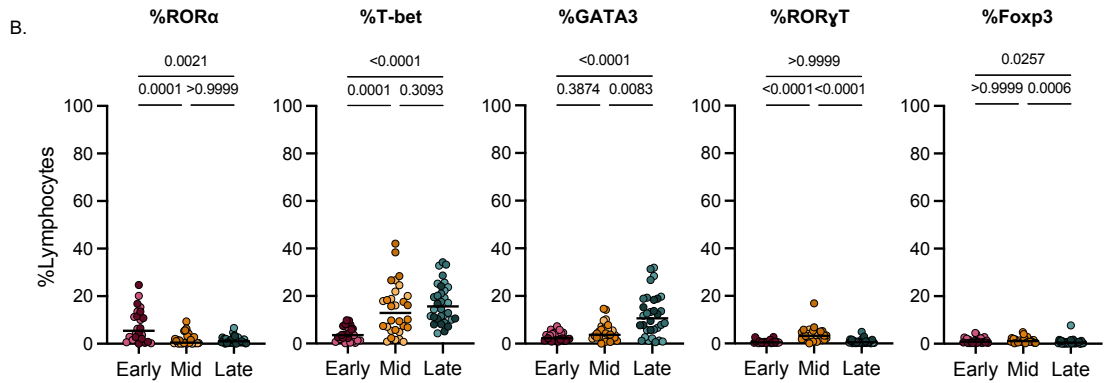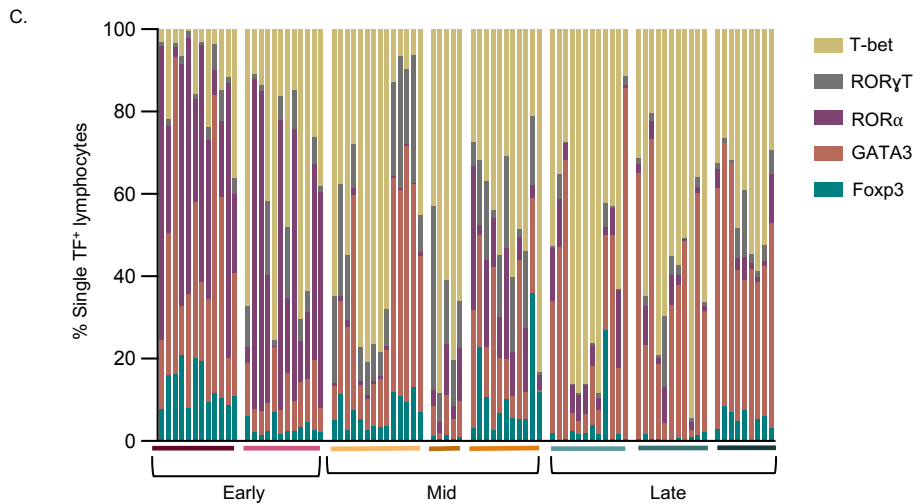

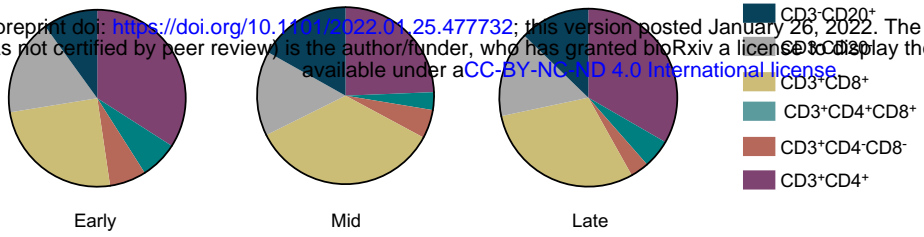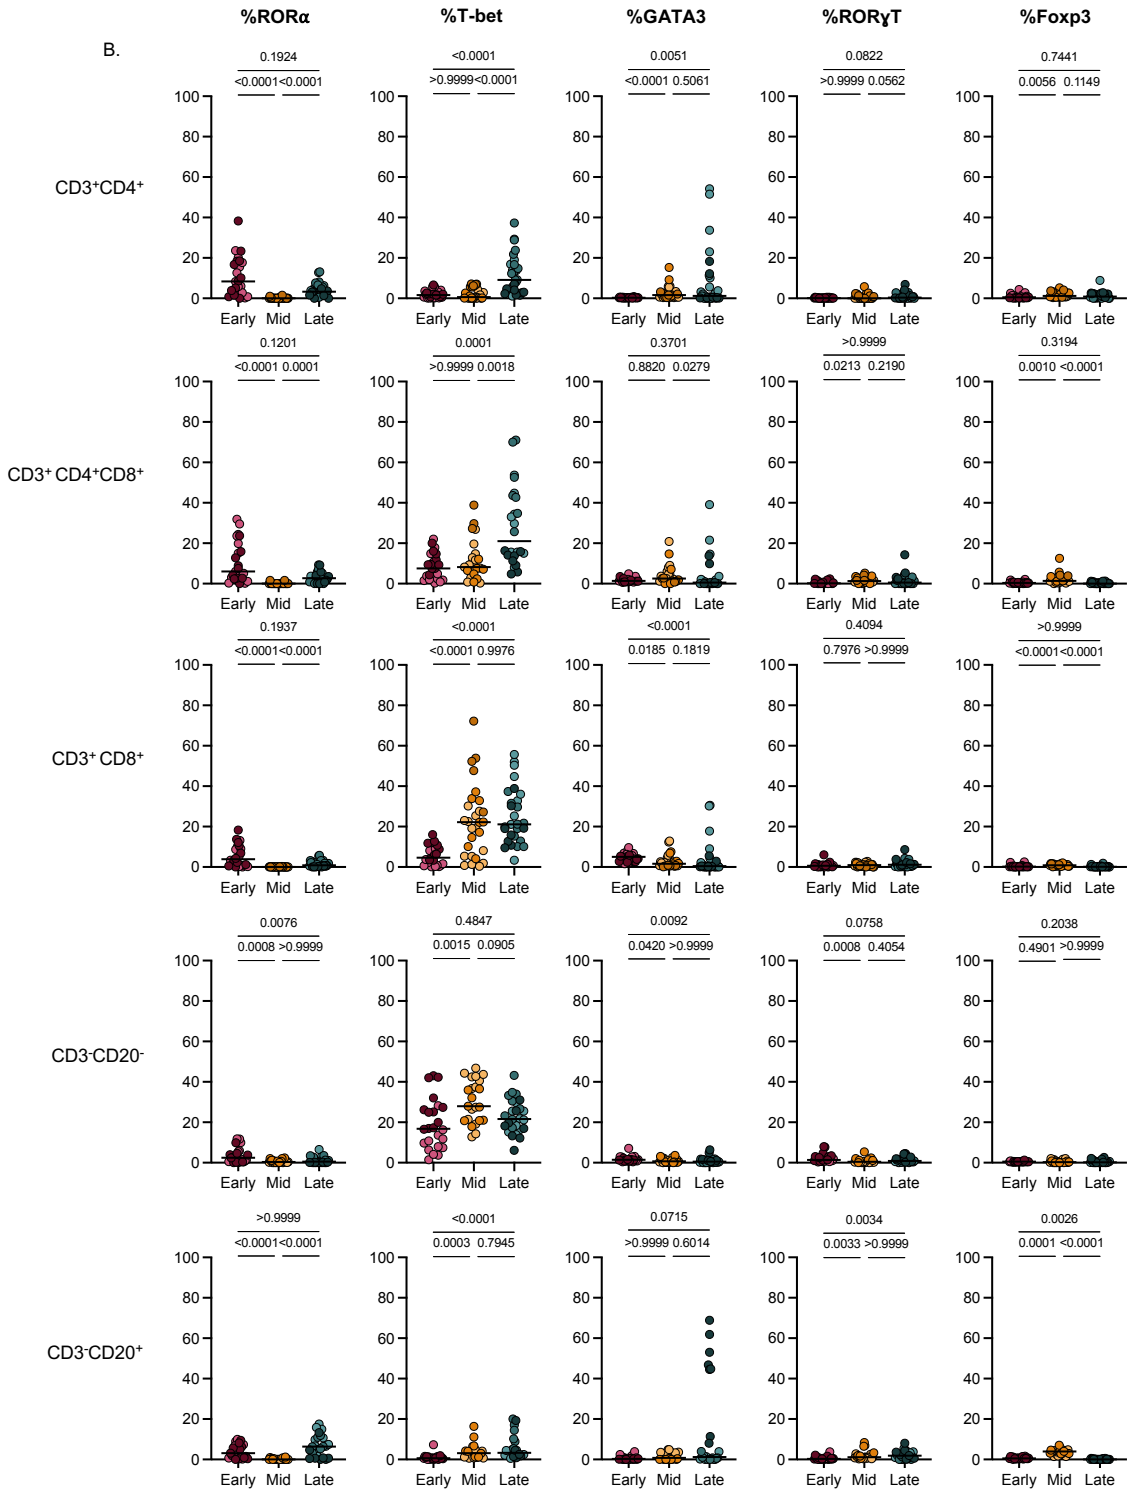



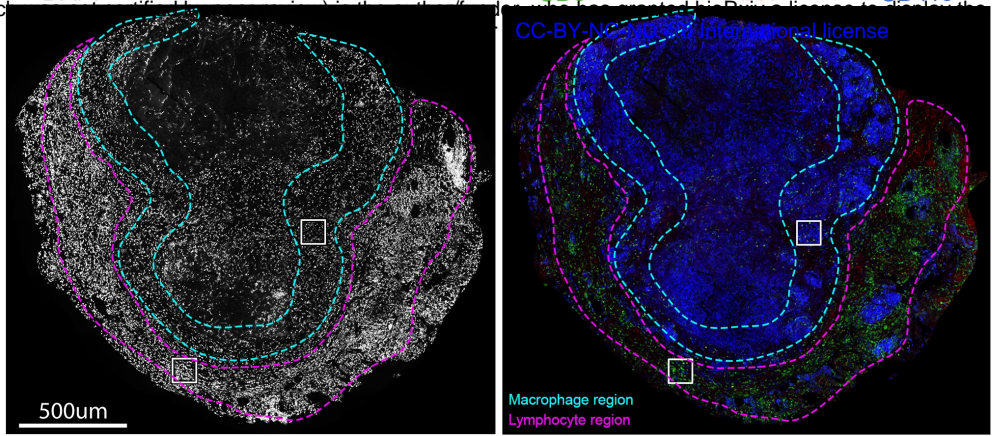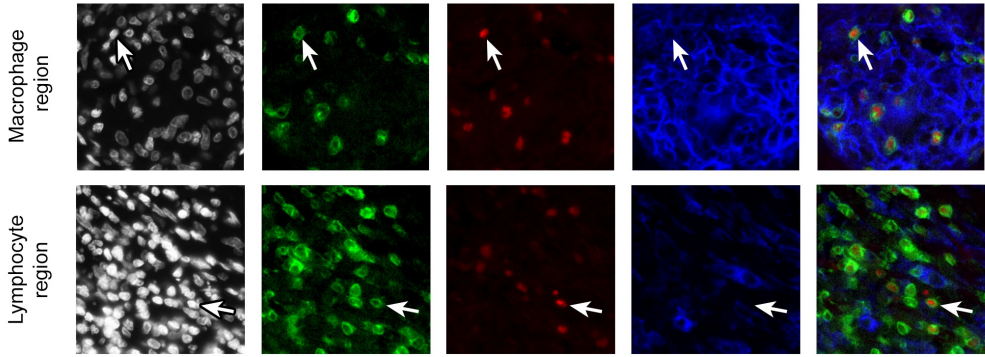

B.

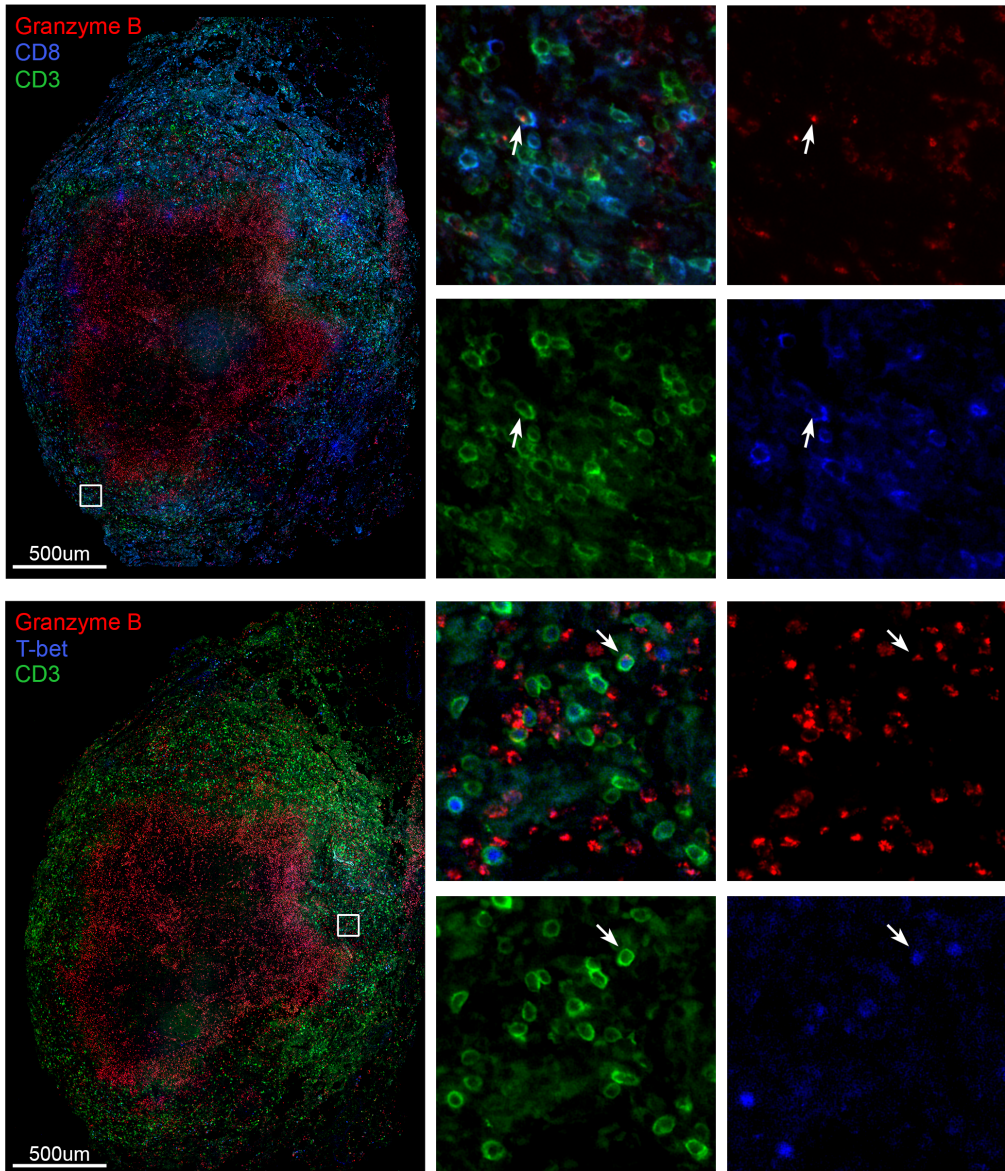

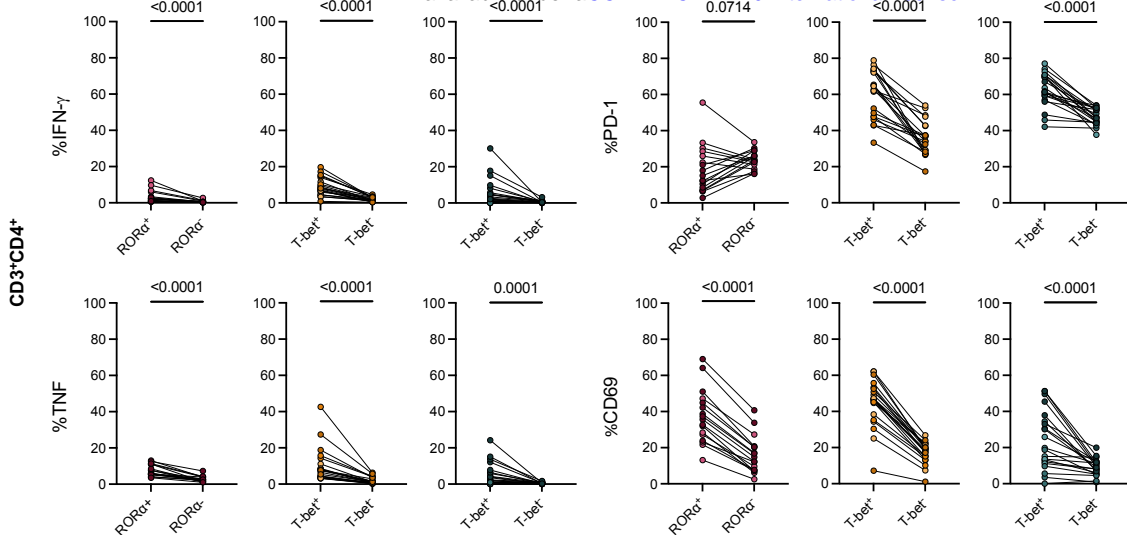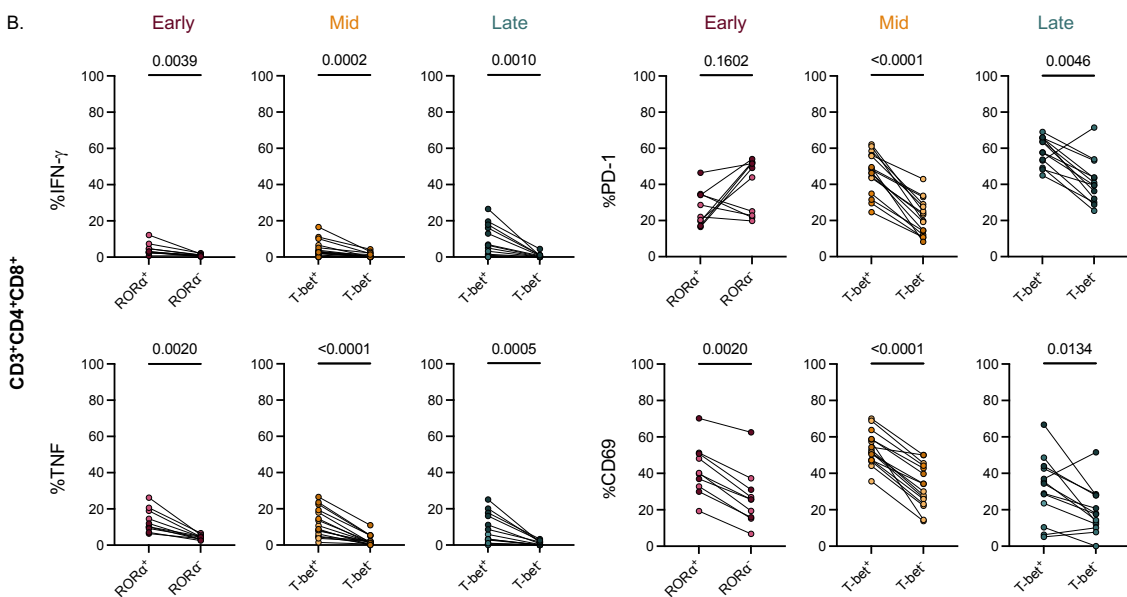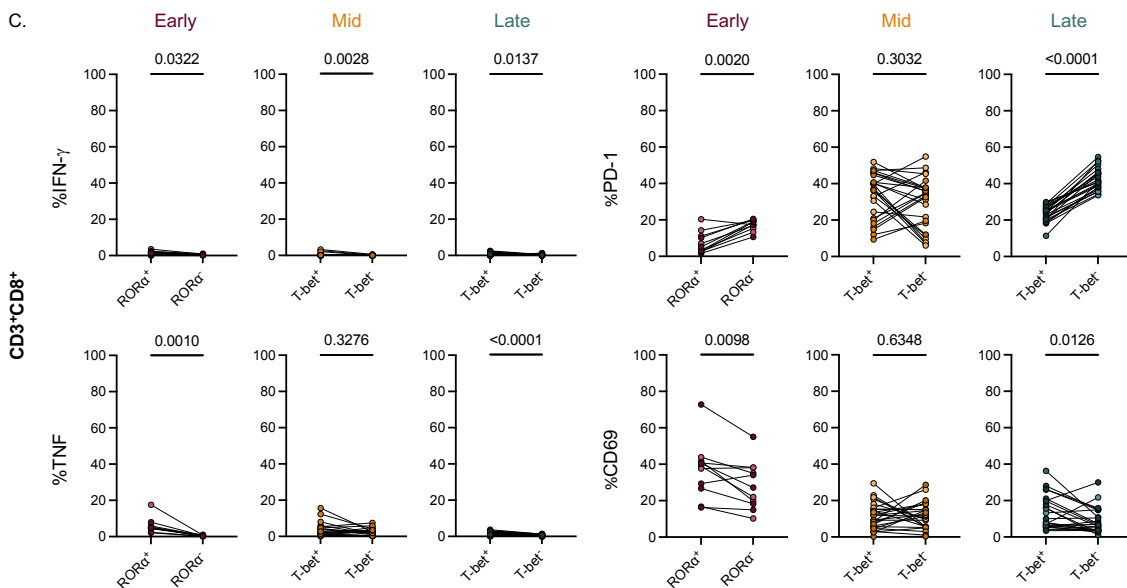

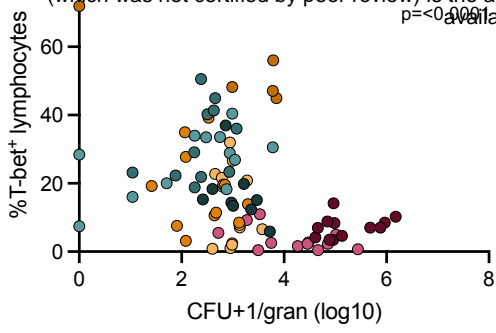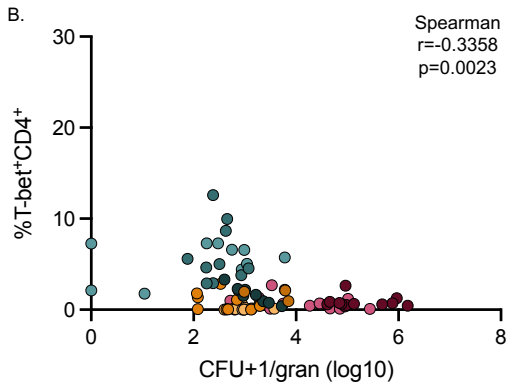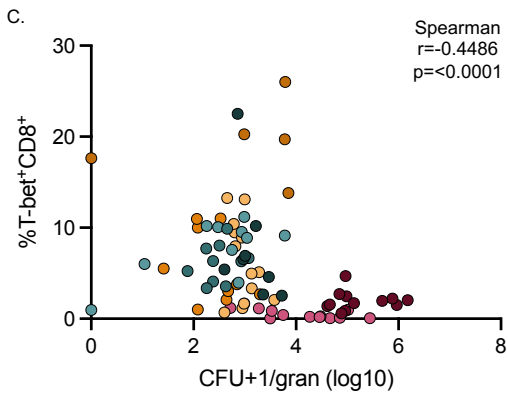

# Early

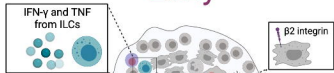

# Mid

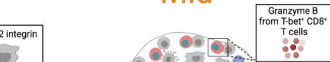

# Late

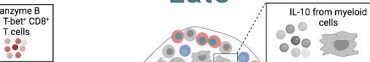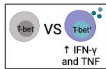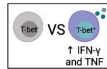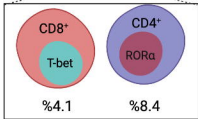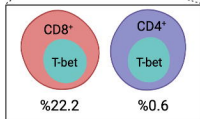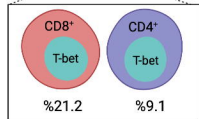

Source: http://biorxiv.org/content/10.1101/2022.01.25.477732v1.full.pdf
